# Supplementary material for: Mixed-methods study exploring health service access and social support linkage to the mental well-being of Canadian Indigenous pregnant persons during the COVID-19 pandemic
Source: PubMed Central journal article supplement — BMJ Open. 2024 Mar 29;14(3):e078388. doi: 10.1136/bmjopen-2023-078388 (PMC11005712; doi:10.1136/bmjopen-2023-078388), 2024-03-29
Supplement: bmjopen-2023-078388.draft_revisions.pdf [file bmjopen-2023-078388.draft_revisions.pdf]

# BMJ Open

BMJ Open is committed to open peer review. As part of this commitment we make the peer review history of every article we publish publicly available.

When an article is published we post the peer reviewers' comments and the authors' responses online. We also post the versions of the paper that were used during peer review. These are the versions that the peer review comments apply to.

The versions of the paper that follow are the versions that were submitted during the peer review process. They are not the versions of record or the final published versions. They should not be cited or distributed as the published version of this manuscript.

BMJ Open is an open access journal and the full, final, typeset and author-corrected version of record of the manuscript is available on our site with no access controls, subscription charges or pay-per-view fees (<http://bmjopen.bmj.com>).

If you have any questions on BMJ Open's open peer review process please email [info.bmjopen@bmj.com](mailto:info.bmjopen@bmj.com)

# BMJ Open

## Health Service Access and Social Support Linked to the Mental Wellbeing of Indigenous Pregnant Persons during the COVID-19 Pandemic

|                               |                                                                                                                                                                                                                                                                                                                                                                                                                                                                                                                                                                                                                                                                                                                                                                                                          |
|-------------------------------|----------------------------------------------------------------------------------------------------------------------------------------------------------------------------------------------------------------------------------------------------------------------------------------------------------------------------------------------------------------------------------------------------------------------------------------------------------------------------------------------------------------------------------------------------------------------------------------------------------------------------------------------------------------------------------------------------------------------------------------------------------------------------------------------------------|
| Journal:                      | <i>BMJ Open</i>                                                                                                                                                                                                                                                                                                                                                                                                                                                                                                                                                                                                                                                                                                                                                                                          |
| Manuscript ID                 | bmjopen-2023-078388                                                                                                                                                                                                                                                                                                                                                                                                                                                                                                                                                                                                                                                                                                                                                                                      |
| Article Type:                 | Original research                                                                                                                                                                                                                                                                                                                                                                                                                                                                                                                                                                                                                                                                                                                                                                                        |
| Date Submitted by the Author: | 31-Jul-2023                                                                                                                                                                                                                                                                                                                                                                                                                                                                                                                                                                                                                                                                                                                                                                                              |
| Complete List of Authors:     | Mollons, Meghan; University of Manitoba, Psychology<br>Levasseur-Puhach, Sydney; University of Manitoba, Psychology<br>Kaur, Jasleen; University of Calgary, Psychology<br>Doyle, Jennifer; The University of British Columbia, Educational and Counselling Psychology<br>Giesbrecht, Gerald ; Alberta Children's Hospital Research Institute; University of Calgary, Department of Community Health Sciences<br>Lebel, Catherine; University of Calgary, Department of Radiology; Alberta Children's Hospital Research Institute<br>Woods, Lindsay; New Directions<br>Tomfohr-Madsen, Lianne; The University of British Columbia, Educational and Counselling Psychology<br>Roos, Leslie; University of Manitoba, Psychology; University of Manitoba Children's Hospital Research Institute of Manitoba |
| Keywords:                     | COVID-19, OBSTETRICS, Social Support, MENTAL HEALTH                                                                                                                                                                                                                                                                                                                                                                                                                                                                                                                                                                                                                                                                                                                                                      |
|                               |                                                                                                                                                                                                                                                                                                                                                                                                                                                                                                                                                                                                                                                                                                                                                                                                          |

SCHOLARONE™  
Manuscripts

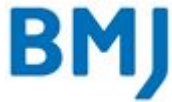

I, the Submitting Author has the right to grant and does grant on behalf of all authors of the Work (as defined in the below author licence), an exclusive licence and/or a non-exclusive licence for contributions from authors who are: i) UK Crown employees; ii) where BMJ has agreed a CC-BY licence shall apply, and/or iii) in accordance with the terms applicable for US Federal Government officers or employees acting as part of their official duties; on a worldwide, perpetual, irrevocable, royalty-free basis to BMJ Publishing Group Ltd ("BMJ") its licensees and where the relevant Journal is co-owned by BMJ to the co-owners of the Journal, to publish the Work in this journal and any other BMJ products and to exploit all rights, as set out in our [licence](#).

The Submitting Author accepts and understands that any supply made under these terms is made by BMJ to the Submitting Author unless you are acting as an employee on behalf of your employer or a postgraduate student of an affiliated institution which is paying any applicable article publishing charge ("APC") for Open Access articles. Where the Submitting Author wishes to make the Work available on an Open Access basis (and intends to pay the relevant APC), the terms of reuse of such Open Access shall be governed by a Creative Commons licence – details of these licences and which [Creative Commons](#) licence will apply to this Work are set out in our licence referred to above.

Other than as permitted in any relevant BMJ Author's Self Archiving Policies, I confirm this Work has not been accepted for publication elsewhere, is not being considered for publication elsewhere and does not duplicate material already published. I confirm all authors consent to publication of this Work and authorise the granting of this licence.

1  
2  
3 **Health Service Access and Social Support Linked to the Mental Wellbeing of Indigenous**  
4 **Pregnant Persons during the COVID-19 Pandemic**  
5

6 Meghan O. Mollons<sup>1</sup>, Sydney Levasseur-Puhach<sup>1</sup>, Jasleen Kaur<sup>2</sup>, Jennifer Doyle<sup>3</sup>, Gerald  
7 Giesbrecht<sup>4,5</sup>, Catherine Lebel<sup>6</sup>, Lindsay Woods<sup>7</sup>, Lianne Tomfohr-Madsen\*<sup>3</sup>, Leslie E.  
8 Roos\*<sup>1,8,9</sup>  
9  
10

11 <sup>1</sup>Department of Psychology, University of Manitoba, Winnipeg, Manitoba, Canada, R3T 2N

12 <sup>2</sup>Department of Psychology, University of Calgary, Calgary, Alberta, Canada, T2N 1N4

13 <sup>3</sup>Department of Educational and Counselling Psychology, and Special Education, University of British Columbia,  
14 Vancouver, British Columbia, V6T 1Z4

15 <sup>4</sup>Departments of Pediatrics and Community Health Sciences, University of Calgary, Calgary, Alberta, Canada, T2N  
16 1N4

17 <sup>5</sup>Owerko Center at the Alberta Children's Hospital Research Institute, Calgary, Alberta, Canada, T2N 1N4

18 <sup>6</sup>Department of Radiology, Alberta Children's Hospital Research Institute, University of Calgary, Calgary, Alberta,  
19 Canada, T2N 1N4

20 <sup>7</sup>New Directions, Winnipeg, Manitoba, Canada, R3G 0M8

21 <sup>8</sup>Children's Hospital Research Institute of Manitoba, Winnipeg, Manitoba, Canada, R3E 3P4

22 <sup>9</sup>Rady Faculty of Health Sciences, University of Manitoba, Winnipeg, Manitoba, Canada, R3E 0W2  
23

24  
25 \*co-senior authorship  
26  
27

28 **The authors declare no conflict of interest.**  
29  
30  
31  
32  
33  
34  
35  
36  
37  
38  
39  
40  
41  
42  
43  
44  
45  
46  
47  
48  
49  
50  
51  
52  
53  
54  
55  
56  
57  
58  
59  
60

## Abstract

*Background:* The COVID-19 pandemic brought widespread health restrictions and limited prenatal care for pregnant individuals. Many Indigenous families, who already face social and health inequalities, saw further restrictions to accessing quality care, unpredictable changes in birthing plans, serious illness inequities, and limited social support. We sought to explore how the unprecedented stressors associated with the COVID-19 pandemic may have contributed to heightened levels of depression and anxiety amongst pregnant Indigenous persons and identify protective individual-level factors.

*Methods:* In a cross-Canada sample of 336 pregnant Indigenous persons, we describe prevalence rates of clinically-elevated depression and anxiety symptoms using standardized measures. Using hierarchical regression models, we examined the extent to which COVID-related factors of service disruption (i.e., changes to prenatal care, changes to birth plans, and social support) were associated with mental wellbeing. Further, through qualitative analyses on open-ended coping questions, we examined the coping strategies utilized by pregnant Indigenous persons in response to the pandemic.

*Results:* Descriptive results revealed elevated rates of clinically relevant depression (52.7%) and anxiety (62.5%) symptoms among this population. 76.8% of participants reported prenatal care service disruptions, including appointment cancellations. Thematic analyses identified coping themes of staying informed, social and/or cultural connections and activities, and internal mental wellbeing strategies.

*Conclusion:* Disruptions to services and decreased quality of prenatal care negatively impacted mental wellbeing of Indigenous persons during the COVID-19 pandemic. Given the potential for mental wellbeing challenges to persist, and long-term effects of perinatal distress, it is important to examine the quality of care that pregnant individuals receive. Service providers should advance policies and practices that promote relationship quality and health system engagement as key factors linked to wellbeing during the perinatal period, for Indigenous persons.

*Keywords:* Prenatal care, Indigenous health, Indigenous pregnancy, service provision, COVID-19

1  
2  
3 Supportive and ongoing prenatal care is vital to optimize pregnancy outcomes [1,2,3),  
4 with regular and secure access to high-quality prenatal care supporting the mental and physical  
5 health of the pregnant person, thereby increasing the likelihood of birthing a healthy child [4,5].  
6 By providing education, counselling, and emotional support, prenatal care can help pregnant  
7 people maintain their overall well-being and promote positive outcomes [5]. Establishing a long-  
8 term relationship with care providers also ensures consistent and coordinated care, builds trust  
9 and improves communication, allows for more personalized care, and promotes positive health  
10 outcomes for the birthing parent and baby [6,7].

11  
12 The COVID-19 pandemic brought widespread health restrictions, limiting people's  
13 access to health care practitioners and services, including prenatal care [8,9]. Due to the  
14 historical and ongoing impacts of colonialism, Indigenous Peoples of Canada already experience  
15 tremendous health inequities, including restricted access to healthcare [10,11]. Access to  
16 pregnancy- specific healthcare services is also impacted by issues such as cultural misalignment,  
17 distance to services, cost, lack of transport, and lack of awareness of available services [12,13].  
18 Additionally concerning are the ways in which distrust of systems of support and systemic  
19 racism can impede access to care. In Canada, a deficit-based discourse around Indigenous health  
20 has contributed to stigmatization, discrimination, and marginalization of Indigenous Peoples'  
21 [14, 15]. Consequently, this leads to a lack of trust in the healthcare system, making pregnant  
22 Indigenous persons less likely to seek care [16].

23  
24 As a result of the COVID-19 pandemic, prenatal care was restricted across Canada, with  
25 some individuals experiencing limited or complete loss of access to their primary health care  
26 providers, obstetricians, and/or midwives, and limited social support during their pregnancies  
27 [17,2]. Smylie and colleagues (2021) found that even pre-pandemic, Indigenous peoples had to  
28 travel away from their home communities more often for prenatal care, particularly birthing,  
29 highlighting disparities in care accessibility. Coupled with a lack of social support and ongoing  
30 systemic racism, this resulted in increased stress levels for pregnant Indigenous persons [18].  
31  
32  
33

### 34 **Mental Wellbeing in the Prenatal period**

35  
36 Pregnancy is a time of major change for individuals, both physically and psychologically,  
37 and is often associated with increased feelings of stress [19,20]. Substantial research has  
38 demonstrated heightened levels of prenatal depression and anxiety experienced during the  
39 COVID-19 pandemic compared to pre-pandemic [21,22,23,25]. Pregnant individuals with  
40 specific sociodemographic factors, such as decreased income and lower education levels, are  
41 more vulnerable to adverse mental wellbeing symptoms during pregnancy [26,27,28]. Canadian  
42 Indigenous populations are at a particular disadvantage in this regard [29] due to the economic  
43 disadvantages they experience as a result of continuing legacies of colonialism [10]. Across  
44 Canada, approximately one-in-five Indigenous persons live in poverty and one-in-six experience  
45 difficulties with their current form of housing [30]. In addition to these economic disparities,  
46 Indigenous persons are also between one-and-a-half to five times as likely to experience trauma-  
47 inducing experiences such as childhood abuse and intimate partner violence [31]. Maintaining  
48 positive mental wellbeing and low stress levels can have positive health outcomes for both the  
49 pregnant individual and their developing baby [20]. This can prove difficult for Indigenous  
50 communities who already face barriers in accessing proper prenatal care and mental wellbeing  
51 support [32,24].  
52  
53

### 54 **Service Disruptions**

1  
2  
3 Adequate and accessible service provisions are vital to the health and wellbeing of  
4 pregnant persons. Groulx and colleagues (2021) noted that service disruptions increased mental  
5 wellbeing concerns among Canadian pregnant individuals. While social distancing and virtual  
6 doctor appointments have been the primary alternative for health services in Canada [33, 34],  
7 this requires individuals to have adequate housing, reliable internet access, and access to  
8 electronic devices, most of which is not easily accessible to a large portion of the population,  
9 particularly in many Indigenous communities [35] which face significantly more barriers in  
10 accessing medical care, specifically prenatal care, than non-Indigenous populations, [36, 24],  
11 including forced travel from home communities to larger cities to give birth. This further restricts  
12 social support availability and access to adequate health care [24]. Long-distance travel for  
13 birthing has increased during the COVID-19 pandemic as obstetrical and health services were  
14 closed [24]. Indigenous persons who are pregnant face poorer birth outcomes, including higher  
15 rates of low-birthweight, preterm birth, and stillbirth [36,37], related to the racial disparities in  
16 access to and quality of prenatal care [38].  
17  
18  
19

### 20 **Social Support**

21 The World Health Organization (2015) reports that community support and engagement  
22 is largely impactful to positive outcomes among pregnant people. Social support, specifically  
23 partner support, has been cited as a resiliency factor for pregnant individuals, particularly those  
24 with high-risk pregnancies [39,40,24]. Social support during the prenatal period can mitigate  
25 adverse mental wellbeing outcomes for pregnant individuals, and subsequently, developmental  
26 outcomes for their babies, such as low birthweight [39,20,34]. However, due to the COVID-19  
27 pandemic, support persons were frequently not allowed to join doctor appointments or had  
28 limited involvement in the birthing process, adding to the stress levels of pregnant individuals  
29 [2,24].  
30  
31  
32

### 33 **Coping Strategies**

34 Commonly used coping strategies for pregnant people during the pandemic include  
35 avoidance, connection with spirituality, and preparation [41,42,43]. For Indigenous persons  
36 specifically, perinatal stress can be experienced at a greater intensity than in other demographics  
37 [44,45]. However, reported coping strategies in the literature generally focus on substance use as  
38 a coping method, in the context of pregnant Indigenous persons [46,47,48,49].  
39  
40

### 41 **Current Study**

42 There is limited knowledge on the impacts of prenatal service disruption due to the  
43 COVID-19 pandemic on pregnant Indigenous persons, and how changes to birth plans and  
44 support levels have impacted the mental wellbeing of individuals pregnant during the COVID-19  
45 pandemic. The objectives of the present study were to (1) examine mental wellbeing (i.e.,  
46 anxiety and depression symptoms) among a sample of pregnant Indigenous persons during the  
47 COVID-19 pandemic, (2) to examine the associations of pandemic related service disruptions  
48 (i.e., changes to prenatal care, changes to birth plans) and social support with mental wellbeing,  
49 and (3) to generate knowledge on Indigenous pregnant peoples self-described coping strategies,  
50 as they relate to the mental wellbeing of this population. This study aims to further develop an  
51 understanding of both adaptive and maladaptive coping strategies used among Indigenous  
52 pregnant persons throughout the pandemic. Obtaining this information may be done most  
53  
54  
55  
56  
57  
58  
59  
60

appropriately using a qualitative approach based on literature suggesting that these methods are most ethically aligned with culturally safe research practices [50].

## Methods

### Participants

The current study reports data collected from the Pregnancy During the COVID-19 Pandemic study [2], an ongoing longitudinal study examining the health impacts of the COVID-19 pandemic on pregnant individuals and their children. Participants were recruited through online recruitment methods, including social media posts and ads on Facebook, Instagram, and Twitter. Participants were invited to join the study if they met the inclusion criteria of: residing in Canada, having the ability to read and write in English and/or French, and having a confirmed pregnancy <35 weeks gestation [33]. Participants were not asked to partake in the study design development. This study was approved by the University of Calgary Conjoint Health Research Ethics Board (REB20-0500).

For the purpose of this study, data include only participants who self-identified as Indigenous (First Nations, Métis, Inuit) or mixed Indigenous descent. Out of the larger sample ( $N = 10,669$ ), 336 individuals self-identified as Indigenous; 45.2% self-identified as Métis, 42.6% self-identified as First Nations, 11.3% self-identified as mixed Indigenous ancestry, and 0.9% self-identified as Inuit. Participants were located in Quebec (25.3%), Ontario (18.8%), Alberta (18.2%), British Columbia (13.7%), Manitoba (11.0%), Saskatchewan (6.8%), Nova Scotia (3.3%), Northwest Territories (1.2%), Yukon (1.2%), and Newfoundland and Labrador (0.6%). On average, participants were  $30.33 \pm 5.0$  years old. Most participants were married or living with a common law partner (86.9%), had completed community college, an equivalent trade or vocational degree, or greater (77.7%), and had an annual household income greater than \$70,000 CAD (57.8%).

### Measures

#### *Depression*

To measure symptoms of depression, the Edinburgh Postnatal Depression Scale (EPDS) was used [51]. The EPDS is a 10-item self-report scale, with scores ranging from 0-30, and is commonly used to assess depression levels amongst pregnant and postnatal individuals [51]. Higher self-report scores indicate increased depressive symptoms, and a cut-off of  $\geq 13$  is used to indicate clinically elevated symptoms of depression [51].

#### *Anxiety*

To measure symptoms of anxiety, the Patient-Reported Outcomes Measurement Information System (PROMIS) Anxiety Adult 7-item short form was used. This self-report measure has possible t-scores ranging from 36.7 to 82.7, with higher scores indicating greater levels of anxiety. A cut-off of  $\geq 60$  is used to indicate clinically elevated symptoms of anxiety [52].

#### *Prenatal care and birth plans*

Participants were asked questions about experiencing changes in prenatal care, prenatal appointment cancellations, changes to birth plans (e.g., changes to birth location, inclusion of support persons, childcare arrangements, or other), and ability to bring partner or support person



1  
2  
3 to appointments. Participants were also asked to indicate which health services were difficult to  
4 access due to the pandemic (e.g., massage, chiropractic, physiotherapy, acupuncture,  
5 psychological counselling, or other). Finally, participants were asked if they felt that the quality  
6 of care had decreased and if they were concerned about self and baby not receiving necessary  
7 care. Responses on these last two items were measured on a scale from 0 – 100, with anchors  
8 being 0 = *not at all*, 50 = *somewhat*, and 100 = *very much so*.  
9  
10

### 11 **Social support**

12 To assess perceived social support, participants completed two questionnaires: The Social  
13 Support Effectiveness Questionnaires (SSEQ; [53]) and the Interpersonal Support Evaluation  
14 List (ISEL; [53]). The SSEQ is a 25-item questionnaire that evaluates the perceived effectiveness  
15 of support received from another person, which for this study was the pregnant individual's  
16 partner. Psychometric evaluation reveals reliability of the SSEQ with alpha ( $\alpha = .87$ ; [53]).  
17

18 The ISEL is a 12-item questionnaire that evaluates general support received from a broader  
19 network, including friends and family [54]. Reliability for the ISEL has been demonstrated in a  
20 cohort of mothers from a general population, with alpha ( $\alpha = .86$ ; [55]).  
21

22 Additionally, participants reported whether they regularly attended a religious, cultural, or  
23 social group that could not meet during the COVID-19 pandemic.  
24

### 25 **Coping**

26 To explore how individuals were coping with the uncertainty and stress of being pregnant  
27 during the COVID-19 pandemic, participants were asked an open-ended question, "*People are*  
28 *responding to the pandemic in many ways. Can you tell us what things you are doing to cope*  
29 *with the COVID-19 pandemic?*"  
30  
31

### 32 **Data Analysis**

#### 33 **Statistical Analysis**

34 IBM SPSS Statistics 28 was used for all statistical analysis. Survey responses were  
35 checked for incomplete or invalid responses, which were removed prior to analyses. Outliers in  
36 the data were also examined and winsorized if  $>3SD$  from the mean of the corresponding  
37 measure. This resulted in the winsorization of two PROMIS Anxiety t-score data points and one  
38 ISEL data point. Descriptive statistics ( $n = 336$ ) were computed for demographic information,  
39 including geographical location, age, marital status, household income, and education.  
40 Additionally, descriptive statistics ( $n = 336$ ) were computed for mental wellbeing, social support,  
41 and disruptions to prenatal care.  
42  
43

44 Hierarchical linear regression analyses ( $n = 260$ ) were used to examine the impact of  
45 various predictors on anxiety (Model 1) and depression (Model 2) for pregnant Indigenous  
46 persons. Block 1 included demographic characteristics, such as age, household income,  
47 education, marital status, savings, gestation, and parity. Block 2 included social support  
48 characteristics, such as levels of general social support, partner social support, and social group  
49 attendance. Finally, Block 3 included COVID-19 related disruptions to prenatal care, such as  
50 changes in care, prenatal appointment cancellations, decrease in quality care, concern about self  
51 and baby not receiving necessary care, changes to birthing plans, trouble accessing healthcare,  
52 and ability to bring partner or support person to appointments. Approximately 23% of  
53 participants ( $n = 76$ ) were missing data for one or more of the predictor variables, and these cases  
54 were handled through listwise deletion for this portion of the analyses.  
55  
56  
57  
58  
59  
60

### ***Qualitative Analysis***

The open-ended response question asking participants to report on the ways they were coping was analyzed qualitatively using a thematic approach. The responses to this question were exported from SPSS to NVivo where they were analyzed and coded thematically for identified themes [56]. As a first phase step, potential codes were documented based on topics from raw data. Analysis began with a deductive assessment of identifying data to fit within the codes. Subsequently, further coding was conducted inductively through the creation of codes based on emerging themes within the data [57]. Themes were exported from SPSS to a password protected file where they were summarized. One coder conducted these analyses for the qualitative data. This coder identifies as an Indigenous woman who has particular interest and experience in studies related to Indigenous family wellness.

### **Results**

Participants in this study experienced a broad range of service disruptions due to the COVID-19 pandemic. Majority of participants (76.8%) experienced changes in prenatal care, including appointment cancellations (59.5%), with close to one-third of participants (32.1%) having made changes to their birthing plan. Specific changes included changes to birth location (11.3%), childcare arrangements (8.3%), and other unspecified changes (2.7%). Additionally, participants also reported changes to support people (25.6%), specifically, not being able to bring a support person to prenatal care appointments (84.5%). Just over half (54.8%) reported difficulties in accessing health care services such as massage (43.8%), chiropractic care (21.4%), psychological counselling (15.8%), physiotherapy (10.7%), other unspecified services (9.2%), and acupuncture (8.6%). A quarter (25%) of participants reported that religious, cultural, or social groups that they regularly attended could not meet during the pandemic. Participants also experienced high levels of psychological distress, with 40% meeting clinical cut-offs for comorbid depression and anxiety, 14% meeting cut-offs for only anxiety, and 5% meeting cut-offs for only depression. Additional sample characteristics for psychological distress, protective factors, and COVID-19 related prenatal care disruptions are noted in **Table 1**.

**Table 1**

*Sample Characteristics for Psychological Distress, Protective Factors, and COVID-19 Related Prenatal Care Disruptions*

| Measure                                     | Mean  | SD   | Range       |
|---------------------------------------------|-------|------|-------------|
| <b>Psychological Distress</b>               |       |      |             |
| Edinburgh postnatal depression scale (EPDS) | 12.77 | 5.26 | 0 – 29      |
| PROMIS anxiety t-scores*                    | 61.15 | 8.07 | 42.1 – 82.7 |
| <b>Protective Factors</b>                   |       |      |             |
| General social support*                     | 37.42 | 7.33 | 14 – 48     |

|                                                            |                         |       |         |
|------------------------------------------------------------|-------------------------|-------|---------|
| Partner social support                                     | 51.21                   | 16.92 | 4 – 80  |
| Social group attendance                                    | 83 yes / 220 no / 7 n/a |       |         |
| <b>COVID-19-related Service Disruption</b>                 |                         |       |         |
| Changes in prenatal care                                   | 258 yes / 45 no         |       |         |
| Prenatal appointment cancellations                         | 103 yes / 200 no        |       |         |
| Decrease in quality care                                   | 45.69                   | 33.07 | 0 – 100 |
| Concern about self and baby not receiving necessary care   | 35.64                   | 31.50 | 0 – 100 |
| Changes in birth plan                                      | 108 yes / 194 no        |       |         |
| Trouble accessing healthcare                               | 184 yes / 118 no        |       |         |
| Ability to bring partner or support person to appointments | 47 yes / 256 no         |       |         |

\* Winsorized

## Depression

Analysis of the first hierarchical linear regression model revealed that all three blocks significantly predicted levels of prenatal depression symptoms among pregnant Indigenous persons. The first block included the demographic variables of age, household income, education, marital status, household savings, gestational age, and parity. This first block accounted for 14.4% of the variance,  $F(7,252) = 6.047$ ,  $p < .001$ ,  $f^2 = 0.17$ . Increased levels of household income ( $p = .004$ ) and savings ( $p = .006$ ) significantly predicted decreased depression symptoms. Additionally, being married, living in a common-law relationship, or living with a partner was also a significant predictor of decreased depression symptoms ( $p = .036$ ).

When added in the second block, general social support, partner social support, and social group attendance significantly accounted for an additional 15.9% of the variance in depression symptoms,  $F(3,249) = 18.881$ ,  $p < .001$ ,  $f^2 = 0.23$ . Overall, the second block accounted for 30.2% of the variance in depression symptoms,  $F(10,249) = 10.798$ ,  $p < .001$ ,  $f^2 = 0.43$ . Higher levels of savings continued to significantly predict decreased depression symptoms ( $p = .021$ ). With respect to social support variables, increased general social support ( $p = .006$ ) and partner social support ( $p < .001$ ) were significantly predictive of decreased depression symptoms.

The third block added COVID-19-related prenatal care disruptions into the model, which accounted for an increased 6.9% of the variance,  $F(7,242) = 3.809$ ,  $p < .001$ ,  $f^2 = 0.11$ . This block accounted for 37.2% of the variance in depression symptoms,  $F(17,242) = 8.422$ ,  $p < .001$ ,  $f^2 = 0.59$ . Increased general social support ( $p = .009$ ) and partner social support ( $p < .001$ ) continued to significantly predict decreased depression symptoms. Of prenatal care disruption variables, experiencing increased concerns about self and baby not receiving necessary care ( $p = .022$ ) and having trouble in accessing healthcare ( $p = .017$ ) significantly predicted increased depression symptoms. See **Table 2** for results of the whole model.

**Table 2**  
*Hierarchical Multiple Regression Analysis Predicting Depression Symptoms*

| Predictors | $\beta$                 | SE    | t    | p      | Adjusted $R^2$ |
|------------|-------------------------|-------|------|--------|----------------|
| Block 1    | Constant                |       |      | <.001* | .120           |
|            | Age                     | -.026 | .08  | -.37   | .713           |
|            | Household income        | -.218 | .21  | -2.90  | .004*          |
|            | Education               | .018  | .35  | .26    | .799           |
|            | Marital status          | -.131 | 1.14 | -2.11  | .036*          |
|            | Savings                 | -.173 | .29  | -2.75  | .006*          |
|            | Gestation               | -.015 | .04  | -.25   | .805           |
|            | Parity                  | .047  | .49  | .72    | .470           |
| Block 2    | Constant                |       |      | <.001* | .274           |
|            | Age                     | -.093 | .08  | -1.41  | .161           |
|            | Household income        | -.105 | .20  | -1.50  | .135           |
|            | Education               | .013  | .33  | .19    | .849           |
|            | Marital status          | -.087 | 1.06 | -1.53  | .127           |
|            | Savings                 | -.134 | .27  | -2.32  | .021*          |
|            | Gestation               | -.006 | .04  | -.12   | .907           |
|            | Parity                  | -.033 | .46  | -.54   | .587           |
|            | General social support  | -.173 | .02  | -2.75  | .006*          |
|            | Partner social support  | -.312 | .05  | -4.65  | <.001*         |
|            | Social group attendance | .073  | .73  | 1.28   | .200           |
| Block 3    | Constant                |       |      | <.001* | .328           |
|            | Age                     | -.079 | .08  | -1.22  | .225           |
|            | Household income        | -.133 | .20  | -1.92  | .056           |
|            | Education               | -.013 | .32  | -.20   | .839           |

|    |                                                            |       |      |       |        |
|----|------------------------------------------------------------|-------|------|-------|--------|
| 1  |                                                            |       |      |       |        |
| 2  |                                                            |       |      |       |        |
| 3  |                                                            |       |      |       |        |
| 4  | Marital status                                             | -.101 | 1.02 | -1.82 | .070   |
| 5  | Savings                                                    | -.105 | .26  | -1.87 | .063   |
| 6  | Gestation                                                  | -.051 | .04  | -.95  | .345   |
| 7  | Parity                                                     | -.012 | .45  | -.21  | .834   |
| 8  | General social support                                     | -.161 | .02  | -2.62 | .009*  |
| 9  | Partner social support                                     | -.243 | .05  | -3.65 | <.001* |
| 10 | Social group attendance                                    | .020  | .73  | .35   | .727   |
| 11 | Changes in prenatal care                                   | .003  | 1.17 | .05   | .962   |
| 12 | Prenatal appointment cancellations                         | -.037 | .75  | -.60  | .552   |
| 13 | Decrease in quality care                                   | -.030 | .02  | -.32  | .751   |
| 14 | Concern about self and baby not receiving necessary care   | .207  | .02  | 2.31  | .022*  |
| 15 | Changes in birth plan                                      | .097  | .69  | 1.70  | .090   |
| 16 | Trouble accessing healthcare                               | .136  | .68  | 2.41  | .017*  |
| 17 | Ability to bring partner or support person to appointments | -.030 | .88  | -.53  | .596   |

\*  $p < .05$

### **Anxiety**

Similar to the first model, analysis of the second hierarchical linear regression model revealed that all three blocks significantly predicted levels of prenatal anxiety symptoms. The first block demonstrated that demographics accounted for 8.0% of the explained variance in anxiety symptoms,  $F(7,252) = 3.110$ ,  $p = .004$ ,  $f^2 = 0.09$ . Increased levels of household income ( $p = .038$ ) and savings ( $p = .007$ ) were significantly predictive of decreased anxiety symptoms. Meanwhile, education, marital status, gestation, and parity did not significantly predict anxiety symptoms.

In the second block, addition of general social support, partner social support, and social group attendance increased the explained variance in anxiety symptoms by 10.9%,  $F(3,249) = 11.201$ ,  $p < .001$ ,  $f^2 = 0.13$ . As a whole, the second block accounted for 18.9% of the variance in anxiety symptoms,  $F(10,249) = 5.801$ ,  $p < .001$ ,  $f^2 = 0.23$ . Increased levels of savings ( $p = .019$ ) continued to be predictive of decreased anxiety symptoms. With respect to social support

variables, increased partner social support predicted lower anxiety symptoms ( $p < .001$ ), while social group attendance and general social support were not significant predictors ( $p > .05$ ).

The addition of COVID-19-related prenatal care service disruptions in the third block increased the explained variance in anxiety symptoms by 10.1%,  $F(7,242) = 4.908$ ,  $p < .001$ ,  $f^2 = 0.14$ . This final block was responsible for predicting 29.0% of the variance in anxiety symptoms,  $F(17,242) = 5.808$ ,  $p < .001$ ,  $f^2 = 0.41$ . Of the demographic and social support variables, only increased partner social support continued to significantly predict decreased anxiety symptoms ( $p = .002$ ). Regarding service care disruptions, experiencing changes in birth plans ( $p = .026$ ) and having trouble accessing healthcare ( $p = .038$ ), significantly predicted increased anxiety symptoms. Further, experiencing increased concerns about self and baby not receiving necessary care also significantly predicted increased anxiety symptoms ( $p < .001$ ). See **Table 3** for results of the whole model.

**Table 3**  
*Hierarchical Multiple Regression Analysis Predicting Anxiety Symptoms*

| Predictors       | $\beta$ | SE   | t     | p     | Adjusted $R^2$ |
|------------------|---------|------|-------|-------|----------------|
| Block 1          |         |      |       | .004* | .054           |
| Age              | -.032   | .12  | -.44  | .663  |                |
| Household income | -.162   | .31  | -2.08 | .038* |                |
| Education        | .096    | .51  | 1.31  | .192  |                |
| Marital status   | -.065   | 1.67 | -1.01 | .315  |                |
| Savings          | -.176   | .43  | -2.70 | .007* |                |
| Gestation        | -.003   | .06  | -.04  | .965  |                |
| Parity           | .055    | .72  | .81   | .418  |                |
| Block 2          |         |      |       | <.001 | .156           |
| Age              | -.095   | .12  | -1.34 | .181  |                |
| Household income | -.069   | .30  | -.91  | .364  |                |
| Education        | .094    | .50  | 1.29  | .197  |                |
| Marital status   | -.021   | 1.60 | -.35  | .729  |                |
| Savings          | -.146   | .41  | -2.36 | .019* |                |
| Gestation        | .004    | .05  | .07   | .941  |                |
| Parity           | -.007   | .70  | -.11  | .914  |                |

1  
2  
3  
4  
5  
6  
7  
8  
9  
10  
11  
12  
13  
14  
15  
16  
17  
18  
19  
20  
21  
22  
23  
24  
25  
26  
27  
28  
29  
30  
31  
32  
33  
34  
35  
36  
37  
38  
39  
40  
41  
42  
43  
44  
45  
46  
47  
48  
49  
50  
51  
52  
53  
54  
55  
56  
57  
58  
59  
60

|         |                                                            |       |      |       |             |
|---------|------------------------------------------------------------|-------|------|-------|-------------|
|         | General social support                                     | -.086 | .03  | -1.27 | .205        |
|         | Partner social support                                     | -.299 | .08  | -4.12 | <.001*      |
|         | Social group attendance                                    | .086  | 1.11 | 1.40  | .162        |
| Block 3 |                                                            |       |      |       | <.001* .240 |
|         | Age                                                        | -.083 | .12  | -1.20 | .231        |
|         | Household income                                           | -.090 | .30  | -1.22 | .223        |
|         | Education                                                  | .064  | .48  | .91   | .364        |
|         | Marital status                                             | -.034 | 1.53 | -.59  | .559        |
|         | Savings                                                    | -.113 | .39  | -1.89 | .061        |
|         | Gestation                                                  | -.046 | .05  | -.80  | .423        |
|         | Parity                                                     | .023  | .68  | .36   | .718        |
|         | General social support                                     | -.079 | .03  | -1.21 | .227        |
|         | Partner social support                                     | -.216 | .08  | -3.06 | .002*       |
|         | Social group attendance                                    | .019  | 1.09 | .32   | .749        |
|         | Changes in prenatal care                                   | .020  | 1.75 | .28   | .780        |
|         | Prenatal appointment cancellations                         | -.072 | 1.12 | -1.10 | .273        |
|         | Decrease in quality care                                   | -.091 | .03  | -.90  | .371        |
|         | Concern about self and baby not receiving necessary care   | .319  | .03  | 3.36  | <.001*      |
|         | Changes in birth plan                                      | .135  | 1.04 | 2.24  | .026*       |
|         | Trouble accessing healthcare                               | .125  | 1.02 | 2.09  | .038*       |
|         | Ability to bring partner or support person to appointments | .003  | 1.31 | .05   | .964        |

\*  $p < .05$

### **Coping**

Approximately half of participants ( $n = 167$ ) responded to the open-ended question about coping, with the majority of responses (67.5%) being between 1 to 20 words in length. Eight themes emerged: *staying informed, physical and/or outdoor activities, passive or independent home-based activities, creative activities, social and/or cultural activities, avoidant approaches, internal mental health strategies, and struggling to cope*. Subcodes (see **Figure 1**) were developed within each theme. Results from open-ended response questions are summarized in **Table 4**.

For peer review only



**Table 4.**  
*Coping Strategies – Qualitative Themes*

| Theme                                            | Sub-Theme(s)                                                                                             | Overview                                                                                                                                                                                                                                                                                                                                                                                                                        | Quotes                                                                                                                                                                                                                                                                                                                                                                                                 |
|--------------------------------------------------|----------------------------------------------------------------------------------------------------------|---------------------------------------------------------------------------------------------------------------------------------------------------------------------------------------------------------------------------------------------------------------------------------------------------------------------------------------------------------------------------------------------------------------------------------|--------------------------------------------------------------------------------------------------------------------------------------------------------------------------------------------------------------------------------------------------------------------------------------------------------------------------------------------------------------------------------------------------------|
| Staying Informed                                 | Adherence to public health guidelines                                                                    | This theme is characterized by caution and care related to public health advisory in response to the pandemic. Staying home, handwashing, wearing a mask, social distancing and adapting daily activities such as work, shopping, and school to virtual mediums were expressed by some participants as eliciting peace of mind.                                                                                                 | <p><i>“Using PPE, being extra cautious.”</i></p> <p><i>“Following health authorities’ guidelines.”</i></p> <p><i>“Staying home. No friends over for the kids or any visiting friends.”</i></p>                                                                                                                                                                                                         |
| Physical and/or Outdoor Activity                 | Being outdoors/in nature<br>Walking<br>Exercising                                                        | Participants shared that spending time outdoors, in nature, and being physically active are practices that support coping through pregnancy during the pandemic. Most commonly, walking and gardening were referenced in this sample.                                                                                                                                                                                           | <p><i>“I find dealing with your head easier when you can put it all into a project with long term benefits. Food and living life are always solid go-to’s for mental health, try to live in the present.”</i></p> <p><i>“I have always been very active outside wilderness trips, kayaking hikes... so I've turned to gardening, making my yard beautiful getting a few chickens to focus on.”</i></p> |
| Passive and/or Home-Based Independent Activities | Comfort and self-care<br>Relaxing and independent activities<br>Keeping busy and taking care of the home | Activities ranging from reading, increasing hours of rest, tackling yard work, and home cleaning, were found to be comforting by many participants. While this theme is characterized by independent activities that can be enjoyed in the home, we differentiate between those who preferred more passive activities such as bathing and napping, and those who preferred more energetic activities, such as household chores. | <p><i>“Keeping my mind occupied with television, reading or sleeping during the day.”</i></p> <p><i>“Keeping the house tidy and clean which has been very satisfying.”</i></p>                                                                                                                                                                                                                         |

1  
2  
3  
4  
5  
6  
7  
8  
9  
10  
11  
12  
13  
14  
15  
16  
17  
18  
19  
20  
21  
22  
23  
24  
25  
26  
27  
28  
29  
30  
31  
32  
33  
34  
35  
36  
37  
38  
39  
40  
41  
42  
43  
44  
45  
46  
47

For peer review only

|                                   |                                  |                                                                                                                                                                                                                                                                     |                                                                                                                                                                                                                                                           |
|-----------------------------------|----------------------------------|---------------------------------------------------------------------------------------------------------------------------------------------------------------------------------------------------------------------------------------------------------------------|-----------------------------------------------------------------------------------------------------------------------------------------------------------------------------------------------------------------------------------------------------------|
| Creative Activities               | Preparing for new baby           | Creative activities were shared by some participants as being beneficial additions to their coping strategies.                                                                                                                                                      | <i>“I am finding ways to make myself more excited about the baby having a friend do weekly bump photos outside my home and making a pregnancy book.”</i>                                                                                                  |
|                                   | Cooking/baking                   | These included making arrangements for a new baby, cooking, baking, and                                                                                                                                                                                             | <i>“Cooking nice food and getting excited about</i>                                                                                                                                                                                                       |
|                                   | Crafting                         | crafting.                                                                                                                                                                                                                                                           | <i>meals.”</i>                                                                                                                                                                                                                                            |
| Social and/or Cultural Activities | Cultural practice and connection | Socializing was a key theme among participants for maintaining wellbeing through the pandemic and navigating isolation during pregnancy. Cultural values were also referenced by some.                                                                              | <i>“I am taking this extra time to really learn new ways to grow and have been reaching out for support more and talking more about my struggles with family and peers. Using snapchat had helped me keep in contact with my friends and loved ones.”</i> |
|                                   | Engaging with children           | Of particular note were the challenges communities faced engaging in                                                                                                                                                                                                | <i>“Trying to connect with the Indigenous community online.”</i>                                                                                                                                                                                          |
|                                   | Safe in-person interactions      | community connection and cultural practices due to additional barriers brought forth by the pandemic.                                                                                                                                                               | <i>“Moved into my parent’s house to have more help with the toddler and more socialization for all of us.”</i>                                                                                                                                            |
|                                   | Virtual social connection        | Participants found that interacting at home with their children, pets, and partners was helpful in mitigating stress. Staying connected to extended family and friends in person when it was safe to do so, or virtually when necessary, was also noted as helpful. |                                                                                                                                                                                                                                                           |
|                                   | Pets                             |                                                                                                                                                                                                                                                                     |                                                                                                                                                                                                                                                           |

1  
2  
3  
4  
5  
6  
7  
8  
9  
10  
11  
12  
13  
14  
15  
16  
17  
18  
19  
20  
21  
22  
23  
24  
25  
26  
27  
28  
29  
30  
31  
32  
33  
34  
35  
36  
37  
38  
39  
40  
41  
42  
43  
44  
45  
46  
47

|                                   |                                                                                       |                                                                                                                                                                                                                                                                                                                                                                                                                                        |                                                                                                                                                                                                                                                                                                                                                                                                                                                                                                   |
|-----------------------------------|---------------------------------------------------------------------------------------|----------------------------------------------------------------------------------------------------------------------------------------------------------------------------------------------------------------------------------------------------------------------------------------------------------------------------------------------------------------------------------------------------------------------------------------|---------------------------------------------------------------------------------------------------------------------------------------------------------------------------------------------------------------------------------------------------------------------------------------------------------------------------------------------------------------------------------------------------------------------------------------------------------------------------------------------------|
| Avoidant Approaches               | Limiting news<br><br>Maintaining normalcy<br><br>Working<br><br>Routine and structure | In contrast to those who found solace in staying informed on matters related to the pandemic, others found it more helpful to avoid news consumption and attempt to remain grounded in normalcy and routine. For example, by continuing to work and be consistent in the structure of their pre-pandemic lives, as well as those of their children, participants felt it easier to cope with circumstances of the broader environment. | <i>“Only watch a little news in the morning but otherwise tuning it out.”</i><br><br><i>“Keeping to my normal pre-pandemic routine as much as possible.”</i>                                                                                                                                                                                                                                                                                                                                      |
| Internal Mental Health Strategies | Optimism and mindfulness<br><br>Gratitude<br><br>Therapy                              | Perception-based strategies were employed by some participants in order to combat stressors arising as a result of the pandemic. These included being optimistic and mindful, finding opportunities to reflect and experience gratitude, taking life one day and a time, and attending mental health therapy sessions.                                                                                                                 | <i>“I lost my mom and brother the year before the pandemic. So, comparatively, perspective has been important. I had already turned ‘inward’ and slowed my life to accommodate my grief journey. Pandemic felt like an extension of this.”</i><br><br><i>“I’ve also been able to find joy in many things, and am extremely grateful to be in such a position to be able to work, help, feel financially stable, and re-connect with my family during what is globally such an uncertain time”</i> |
| Struggling to Cope                | Not Coping                                                                            | Some participants stated that they are not coping well, if at all. Expressions of frustration with public health regulations were also shared.                                                                                                                                                                                                                                                                                         | <i>“I am not coping well.”</i><br><br><i>“I’m not [coping].”</i><br><br><i>“Beyond the things above grocery shopping, it really stresses me out. I hate all the stupid rules...”</i>                                                                                                                                                                                                                                                                                                              |

**Figure 1**  
*Coping Strategies Themes and subthemes*

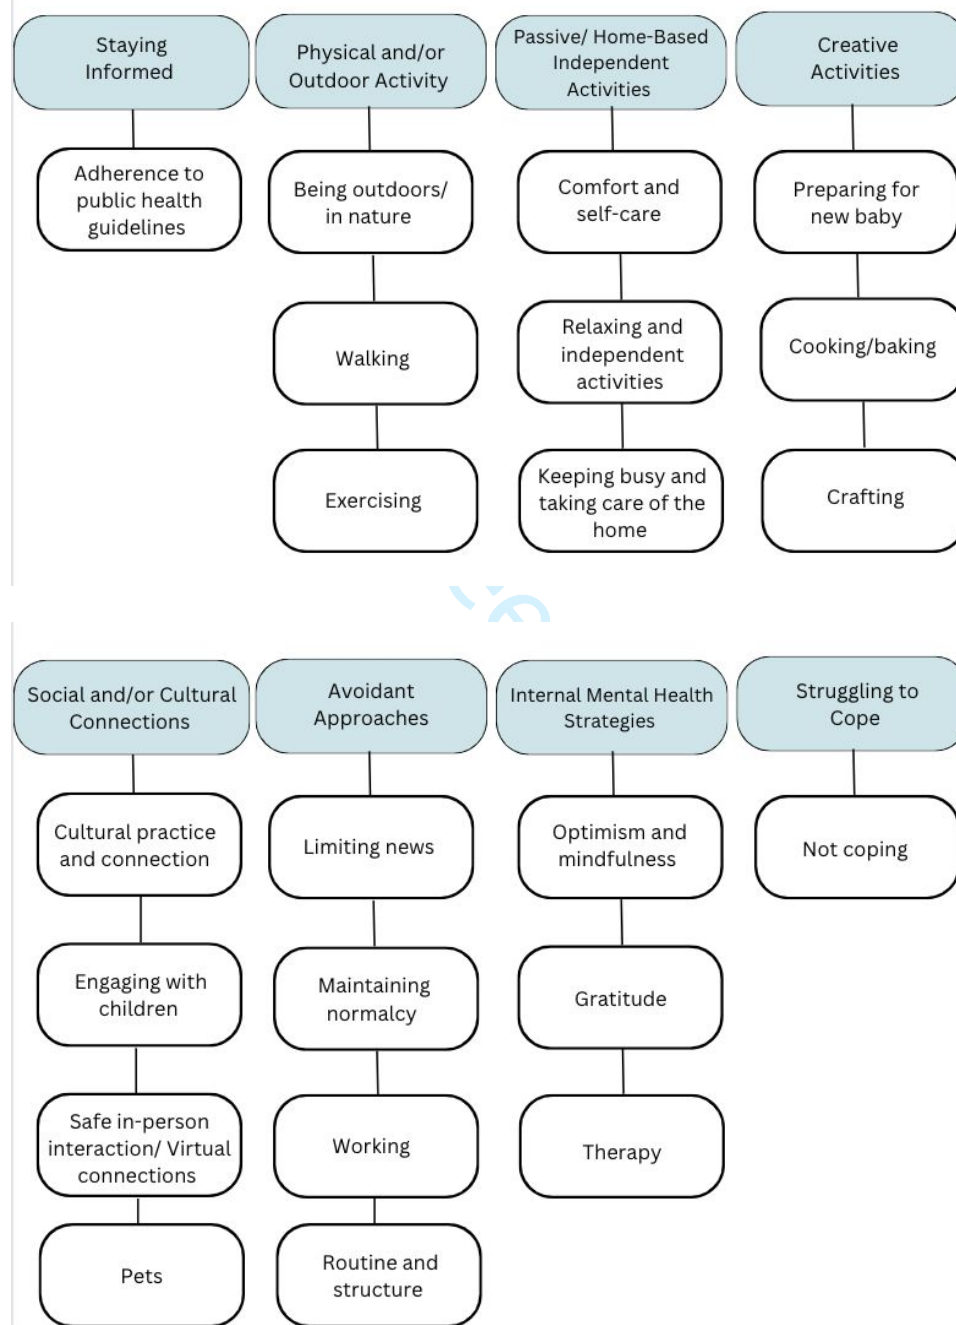

**Discussion**

During the COVID-19 pandemic, over half (>50%) of Indigenous pregnant individuals in our sample experienced clinically significant levels of prenatal depression and/or anxiety. Heightened levels of both depression and anxiety may have been impacted by uncertainty around the impacts of COVID-19, and time during which the data was collected, as health restrictions were high. Our results are consistent with other studies reporting increased depression and

1  
2  
3 anxiety among pregnant individuals [29,2], along with increased mental wellbeing concerns  
4 amongst Indigenous populations [10,24]. Participants reported increased service disruptions due  
5 to the COVID-19 pandemic, including restricted access to quality care and decreased quality of  
6 prenatal care, changes to birthing plans, and decreased opportunities for social support during  
7 birthing.  
8  
9

10 Healthcare service use among pregnant individuals is dependent upon several elements  
11 related to sociodemographic factors, economics, and facility logistics, including distance to and  
12 quality of health care [58]. The COVID-19 pandemic presented with unique challenges that  
13 further limited healthcare service use among pregnant individuals due to issues such as decreased  
14 access to prenatal services and concerns about contracting COVID-19 [59]. For Indigenous  
15 communities, systemic racial discrimination and inequalities in health care accessibility create  
16 further barriers in accessing quality prenatal care [10,11,24]. Previous research suggests that  
17 there are strong associations between limited access to prenatal care and psychological distress  
18 among pregnant individuals, and our results mirror these findings when examining the  
19 Indigenous pregnant population in Canada [2].  
20  
21

22  
23 The importance of accessible quality prenatal care for both the pregnant individual and  
24 unborn baby cannot be overstated in discussions to support the psychological wellbeing of  
25 Indigenous pregnant individuals. Experiencing difficulties in access to prenatal care and having  
26 greater concerns about quality of care was significantly predictive of both prenatal depression  
27 and anxiety symptoms. Additionally, experiencing changes in birthing plans was significantly  
28 predictive of prenatal anxiety. Pregnancy care service quality and accessibility issues along with  
29 changes in birth plan are linked to depressive and anxiety-based symptoms across multiple  
30 studies [60,61,62,63]. Discomfort with novel healthcare processes, such as virtual or telehealth  
31 appointments, and overlapping stress from experiencing a pregnancy during a global health  
32 pandemic may have further impacted self-reported levels of depression and anxiety. As  
33 pregnancies can be a time of heightened stress levels, uncertainties about accessing and quality  
34 of prenatal care are likely to impact mental wellbeing [64,65,66].  
35  
36

37  
38 These findings are aligned with others that have emerged in the literature regarding  
39 pregnancy during the pandemic with anxiety, depression, and healthcare challenges noted  
40 consistently [67,22,68,69]. Theoretical foundations to support these findings can be seen in  
41 Maslow's classic conceptualization of the Hierarchy of Needs (1943) where it is said that certain  
42 needs must be addressed prior to others. Specifically, physiological needs are posited to be of  
43 primary importance and said to be critical to address first, in order to then consider other needs.  
44 In this study, participants' disclosures of distress related to issues with basic healthcare reflects  
45 the imperative nature of caring for such fundamental needs. In addition to health inequities,  
46 Indigenous peoples also face socioeconomic disparities [71] which create further barriers in  
47 accessing health care and is consistent with policies to reduce poverty related stress [72]. The  
48 impacts of colonization and generational wealth policies systematically create barriers for the  
49 wellness of pregnant Indigenous individuals. Due to the recruitment methodology of the larger  
50 Pregnancy During the COVID-19 Pandemic study, the sample generally skews towards higher  
51 socioeconomic status, thus, we may expect the importance of financial security to be more  
52 relevant in a more representative sample.  
53  
54  
55  
56  
57  
58  
59  
60

1  
2  
3 In addition to prenatal care, findings of this study also suggest the notable influence of social  
4 support on the wellbeing of pregnant Indigenous persons. Increased partner social support was  
5 predictive of decreased levels of depression and anxiety, while increased general social support  
6 was predictive of decreased levels of depression only. Similar findings were reported in the  
7 larger *Pregnancy during the Pandemic* sample by Lebel and colleagues (2020), which found that  
8 both partner and general social support predicted reduced levels of anxiety and depression in  
9 pregnant individuals. These findings mirror previous literature in the field, which demonstrates  
10 significant associations between social support and mental wellbeing concerns among pregnant  
11 individuals broadly [73,74,75], and among Indigenous pregnant individuals [32]. The emergence  
12 of partner social support as the most significant predictor for prenatal anxiety and depression in  
13 comparison to other levels of social support (i.e., general social support and social group  
14 attendance) is expected. At the height of the COVID-19 pandemic, numerous public health  
15 measures, such as mandatory lockdowns and social distancing, were introduced to limit  
16 transmission of the virus. For many individuals, these changes inadvertently affected access to  
17 social support systems outside the home, thereby increasing reliance on such systems within the  
18 home [76]. The COVID-19 Family Disruption Model [76] highlights the importance of these  
19 relationships and social support systems in maintaining wellbeing during periods of heightened  
20 stress. For pregnant individuals, the significant association between prenatal mental wellbeing  
21 and partner social support during the COVID-19 pandemic [77,78,22] presents partner support as  
22 a modifiable protective factor to enhance prenatal wellbeing.  
23  
24  
25  
26

27 In alignment with our objective to understand coping strategies, qualitative results reveal  
28 various approaches to coping with stressors as arisen through experiencing a pregnancy during a  
29 global health pandemic. These include strategies such as staying informed on the progression of  
30 the pandemic and public health guidelines, engaging in physical and/or outdoor activity,  
31 engaging in home-based and/or other independent activities, engaging in creative activities,  
32 engaging in social and cultural activities with family, developing mental wellbeing strategies and  
33 routines, (e.g., meditation, practicing gratitude, therapy) and attempting to avoid the pandemic  
34 reality (e.g., limiting news consumption). This is consistent with extant literature on coping  
35 mechanisms related to avoidance-based activities, connection driven activities, and alignment  
36 with recommendations for safety from public health governing bodies [41,42,43]. Some  
37 participants expressed struggles to cope or a perceived lack of coping entirely. Struggling to cope  
38 has been a consistent experience across pregnant individuals during the pandemic with shifting  
39 availability of pre-pandemic coping strategies and a substantial deviation from normalcy [79].  
40  
41  
42

43 In Canada specifically, pregnant individuals during the pandemic were found to have  
44 increased rates of depression and anxiety as amplified by financial strain, social isolation, risk of  
45 contracting the COVID-19 infection, and relationship difficulties, which were buffered by social  
46 support [80,34]. With Indigenous persons in Canada, we expect to see increased levels of distress  
47 due to disproportionate negative mental wellbeing experiences observed within that demographic  
48 [81,44,45]. This is exacerbated through neglectful and harmful interactions with healthcare  
49 systems [82]. It is important to acknowledge the resilience developed among Indigenous parents  
50 who continue to engage in support service-oriented research despite negative past and ongoing  
51 experiences throughout their pursuit of care in the perinatal period. Respondents in this study  
52 reported strengths with social and partner support and the use of various coping strategies which  
53 appear to add to resilience factors.  
54  
55  
56  
57  
58  
59  
60

1  
2  
3  
4 According to Lazarus and Folkman Transactional Theory of Stress and Coping (TTSC)  
5 (1984) individuals interact with stress in a transactional exchange with their environment.  
6 Coping that ensues is said to be categorized based on problem focused and emotion focused  
7 strategies. Active coping aimed at addressing a given stressor is characteristic of a problem  
8 focused approach, whereas passive and avoidance-based coping is often representative of  
9 emotion focused strategies. Given that addressing the ‘problem’ at the root of the stressor in this  
10 circumstance, namely the COVID-19 virus, was largely outside of participants’ control, active  
11 coping was seen in this sample through adherence to public health guidelines and taking steps to  
12 engage in health promoting activities such as being physically active and spending time  
13 outdoors. Additionally, avoidance-oriented coping was also noted in this sample, such as limited  
14 new consumption. Therefore, in keeping with the TTSC, both problem and emotion focused  
15 coping strategies are exemplified in our findings.  
16  
17  
18

19 The Breath of Life Theory, coined by Blackstock (2011), has been proposed as a critical  
20 framework for understanding relational elements of wellbeing and culturally centred  
21 understanding of needs for Indigenous, specifically First Nations, people. Our findings related to  
22 coping and social support provide evidence to support this in the present study, as these factors  
23 revealed connection to spiritual and cultural practice as well as social connection were vital  
24 supports in the face challenges imposed by the pandemic provide evidence to support this in the  
25 present study.  
26  
27  
28

### 29 **Limitations**

30 Recruitment relying primarily on social media potentially reduced the number of participants  
31 that may have otherwise been recruited with a broader reach through other means. This may have  
32 also inflated the socioeconomic status of the sample due to the need for participants to have  
33 access to technology and social media. Therefore, our sample demographics reported household  
34 income as greater than the median for Canadian families in 2019 [85], which does not accurately  
35 reflect median incomes for Indigenous populations [86]. Further, research practices have been  
36 historically harmful when conducted with Indigenous populations [87,88,72]. This has led to  
37 mistrust of research groups and practices among Indigenous peoples and, consequently, may  
38 have impeded the participation of some Indigenous pregnant persons in this study. Finally, due to  
39 the heterogeneity of Indigenous communities, these findings may not be generalizable across all  
40 Indigenous Nations and individuals, as values and beliefs held by one Nation or individual are  
41 not necessarily reflective of all. Accordingly, caution must be exercised in interpreting these  
42 results to not erroneously assume pan-Indigeneity of perspectives shared and conclusions drawn  
43 herein. Lastly, anxiety and depression symptom scores were based on self-report scores and not  
44 clinical diagnoses.  
45  
46  
47

### 48 **Implications and Future Directions**

49 These results carry important implications for the information of pregnant Indigenous  
50 persons through the illustration of challenges in accessibility of care and changes in prenatal care  
51 resulting from the pandemic. Healthcare providers may benefit from findings produced through  
52 this study to inform change aimed at adequately accommodating the healthcare related needs of  
53 Canadian Indigenous peoples experiencing a pregnancy. As part of the greater longitudinal  
54 objectives, future research will continue to track mental wellbeing of individuals who were  
55  
56  
57  
58  
59  
60

1  
2  
3 pregnant during the pandemic and examine child wellbeing outcomes. Postpartum care will be  
4 studied to understand the extent to which services are improved or hindered as the pandemic  
5 progresses.  
6

7  
8 Service disruptions and/or low qualitative prenatal care is a serious issue which exacerbates  
9 systemic inequities and contributes to poor mental wellbeing [12,24]. Social support, including  
10 partners and social groups, seems to be a protective factor for pregnant individuals. Enhancing  
11 the efficacy of policies and programming surrounding prenatal care to increase accessibility and  
12 incorporate protective factors can increase quality of care. Further research in this area is  
13 warranted to understand the impact of COVID-19 on pregnant individuals, as exemplified by the  
14 following open-text response received from one of our participants:  
15

16  
17 *“I appreciate your researchers looking into this as for some time when the pandemic*  
18 *started, I felt invisible as a pregnant person as no one was paying attention to us so*  
19 *this makes me feel really good that as a group we are being considered. Thank you*  
20 *for your work.”*  
21  
22  
23  
24  
25  
26  
27  
28  
29  
30  
31  
32  
33  
34  
35  
36  
37  
38  
39  
40  
41  
42  
43

44 **Funding:** This research was funded in part, by a Social Sciences and Humanities Research  
45 Council (SSHRC) Insight Grant. Funding for author GG was provided by the Owerko Center,  
46 Alberta Children’s Hospital Research Institute. Salary funding for authors CL and LTM was  
47 provided by the Canada Research Chairs (CRC) program. Funding for author LR was provided  
48 by Research Manitoba, Canadian Institutes of Health Research (CIHR), SSHRC, and the  
49 Children’s Hospital Research Institute of Manitoba.  
50  
51  
52  
53  
54  
55  
56  
57  
58  
59  
60



## References

- [1] Chen, X. K., Wen, S. W., Yang, Q., & Walker, M. C. (2007). Adequacy of prenatal care and neonatal mortality in infants born to mothers with and without antenatal high-risk conditions. *Aust NZ J Obst Gyn*, 47, 122–7. <https://doi.org/10.1111/j.1479-828X.2007.00697.x>
- [2] Groulx, T., Bagshawe, M., Giesbrecht, G., Tomfohr-Madsen, L., Hetherington, E., & Lebel, C. A. (2021). Prenatal care disruptions and associations with maternal mental health during the Covid-19 pandemic. *Frontiers in Global Women's Health*, 2. <https://doi.org/10.3389/fgwh.2021.648428>
- [3] Hohmann-Marriott, B. (2009). The couple context of pregnancy and its effects on prenatal care and birth outcomes. *Mat Child Health Journal*, 13, 745–54. <https://doi.org/10.1007/s10995-009-0467-0>
- [4] American Academy of Pediatrics and the American College of Obstetricians and Gynecologists. (2012). Preconception and antepartum care, intrapartum and postpartum care of the mother. Guidelines for Perinatal Care. 7th Edition. American Academy of Pediatrics and American College of Obstetricians and Gynecologists, 95-210. <https://doi.org/10.1542/9781581107715>
- [5] Buultjens, M., Gill, J., Fielding, J., Lambert, K. A., Vondeling, K., Mastwyk, S. E., Sloane, S., Fedele, W., Karimi, L., Milgrom, J., von Treuer, K., & Erbas, B. (2023). Maternity care during a pandemic: Can a hybrid telehealth model comprising group interdisciplinary education support maternal psychological health? *Women and Birth: Journal of the Australian College of Midwives*, 36(3), 305–313. <https://doi.org/10.1016/j.wombi.2022.09.007>
- [6] Evans, W. N., & Lien, D. S. (2005). The benefits of prenatal care: Evidence from the PAT bus strike. *Journal of Econometrics*, 125(1), 207–239. <https://doi.org/10.1016/j.jeconom.2004.04.007>
- [7] McDuffie, R. S., Jr, Beck, A., Bischoff, K., Cross, J., & Orleans, M. (1996). Effect of frequency of prenatal care visits on perinatal outcome among low-risk women: A randomized controlled trial. *JAMA*, 275(11), 847–851. <https://doi.org/10.1001/jama.1996.03530350029030>
- [8] Pant, S., Koirala, S., & Subedi, M. (2020). Access to maternal health services during COVID-19. *Europasian Journal of Medical Sciences*, 2(2), 46-50. <https://doi.org/10.46405/ejms.v2i2.110>
- [9] Sanders, J., & Blaylock, R. (2021). “Anxious and traumatised”: Users’ experiences of maternity care in the UK during the COVID-19 pandemic. *Midwifery*, 102, 103069. <https://doi.org/10.1016/j.midw.2021.103069>

- 1  
2  
3 [10] Kim, P. J. (2019). Social determinants of health inequities in Indigenous Canadians through  
4 a life course approach to colonialism and the Residential School System. *Health Equity*,  
5 3(1), 378–381. <https://doi.org/10.1089/heq.2019.0041>  
6  
7  
8 [11] Richmond, C., & Cook, C. (2016). Creating conditions for Canadian Aboriginal health  
9 equity: The promise of healthy public policy. *Public Health Reviews*, 37.  
10 <https://doi.org/10.1186/s40985-016-0016-5>  
11  
12  
13 [12] Akter, S., Davies, K., Rich, J. L., & Inder, K. J. (2019). Indigenous women's access to  
14 maternal healthcare services in lower- and middle-income countries: a systematic  
15 integrative review. *International Journal of Public Health*, 64(3), 343-353.  
16 <https://doi.org/10.1007/s00038-018-1177-4>  
17  
18  
19 [13] Leason, J. L. (2018). Exploring the complex context of Canadian Indigenous maternal child-  
20 health through maternity experiences: The role of social determinants of health. *Social*  
21 *Determinants of Health*, 4(2), 54-67. <https://doi.org/10.22037/sdh.v4i2.19504>  
22  
23  
24 [14] Harding, L. (2018). *What's the harm? Examining the stereotyping of Indigenous peoples in*  
25 *health systems* [Unpublished doctoral thesis]. Simon Fraser University.  
26  
27  
28 [15] Joseph, B. (2018). *21 Things you may not know about the Indian Act: Helping Canadians*  
29 *make reconciliation with Indigenous peoples a reality*. Indigenous Relations Press.  
30  
31  
32 [16] Hyett, S. L., Gabel, C., Marjerrison, S., & Schwartz, L. (2019). Deficit-Based Indigenous  
33 health research and the stereotyping of Indigenous peoples *Canadian Journal of*  
34 *Bioethics*, 2(2), 2561-4665. <https://doi.org/10.7202/1065690ar>  
35  
36  
37 [17] Public Health Agency of Canada. (2020). *Pregnancy, Childbirth and Caring for Newborns:*  
38 *Advice for Mothers During COVID-19*. Available online at:  
39 [https://www.canada.ca/en/public-health/services/diseases/2019-novel-coronavirus-](https://www.canada.ca/en/public-health/services/diseases/2019-novel-coronavirus-infection/prevention-risks/pregnancy-childbirth-newborn.html#a1)  
40 [infection/prevention-risks/pregnancy-childbirth-newborn.html#a1](https://www.canada.ca/en/public-health/services/diseases/2019-novel-coronavirus-infection/prevention-risks/pregnancy-childbirth-newborn.html#a1)  
41  
42  
43 [18] Leason, J. (2021). Indigenous women's stress and postpartum depression: Discussions from  
44 the Canadian maternity experiences survey and Indigenous maternity narratives.  
45 *International Journal of Indigenous Health*, 16(2), 225-243.  
46 <https://doi.org/10.32799/ijih.v16i2.33180>  
47  
48 [19] Dayan, J., Creveuil, C., Marks, M. N., Conroy, S., Herlicoviez, M., Dreyfus, M., &  
49 Tordjman, S. (2006). Prenatal depression, prenatal anxiety, and spontaneous preterm  
50 birth: a prospective cohort study among women with early and regular care.  
51 *Psychosomatic Medicine*, 68, 938–946. <https://doi.org/10.1097/01.psy.0000244025.20>  
52 [549.bd](https://doi.org/10.1097/01.psy.0000244025.20)  
53  
54  
55  
56  
57  
58  
59

- 1  
2  
3 [20] Elsenbruch, S., Benson, S., Rücke, M., Rose, M., Dudenhausen, J., Pincus-Knackstedt, M.  
4 K., Klapp, B. F., & Arch, P. C. (2007). Social support during pregnancy: Effects on  
5 maternal depressive symptoms, smoking and pregnancy outcome. *Human Reproduction*,  
6 22(3), 869-877. <https://doi.org/10.1093/humrep/del432>  
7  
8  
9 [21] Hessami, K., Romanelli, C., Chiurazzi, M., & Cozzolino, M. (2022). COVID-19 pandemic  
10 and maternal mental health: a systematic review and meta-analysis. *The Journal of*  
11 *Maternal-Fetal & Neonatal Medicine*, 35(20), 4014-4021.  
12 <https://doi.org/10.1080/14767058.2020.1843155>  
13  
14 [22] Lebel, C., MacKinnon, A., Bagshawe, M., Tomfohr-Madsen, L., & Giesbrecht, G. (2020).  
15 Elevated depression and anxiety symptoms among pregnant individuals during the  
16 COVID-19 pandemic. *Journal of Affective Disorders*, 277, 5-13.  
17 <https://doi.org/10.1016/j.jad.2020.07.126>  
18  
19 [23] Racine, N., Hetherington, E., McArthur, B. A., McDonald, S., Edwards, S., Tough, S., &  
20 Madigan, S. (2021). Maternal depressive and anxiety symptoms before and during the  
21 COVID-19 pandemic in Canada: a longitudinal analysis. *The Lancet Psychiatry*, 8(5),  
22 405-415. [https://doi.org/10.1016/S2215-0366\(21\)00074-2](https://doi.org/10.1016/S2215-0366(21)00074-2)  
23  
24 [24] Smylie, J., O'Brien, K., Beaudoin, E., Daoud, N., Bourgeois, C., Harney George, E., Bebee,  
25 K., & Ryan, C. (2021). Long-distance travel for birthing among Indigenous and non-  
26 Indigenous pregnant people in Canada. *Canadian Medical Association Journal*, 193, 948-  
27 955. <https://doi.org/10.1503/cmaj.201903>  
28  
29 [25] Tomfohr-Madsen, L. M., Racine, N., Giesbrecht, G. F., Lebel, C., & Madigan, S. (2021).  
30 Depression and anxiety in pregnancy during COVID-19: A rapid review and meta-  
31 analysis. *Psychiatry Research*, 300, 113912.  
32 <https://doi.org/10.1016/j.psychres.2021.113912>  
33  
34 [26] Cena, L., Gigantesco, A., Mirabella, F., Palumbo, G., Camoni, L., Trainini, A., & Stefana,  
35 A. (2021). Prevalence of comorbid anxiety and depressive symptomatology in the third  
36 trimester of pregnancy: Analysing its association with sociodemographic, obstetric, and  
37 mental health features. *Journal of Affective Disorders*, 295, 1398-1406.  
38 <https://doi.org/10.1016/j.jad.2021.09.015>  
39  
40 [27] Giesbrecht, G.F., van de Wouw, M., Rioux, C., Lai, B.P.Y., King, S., Tomfohr-Madsen, L  
41 & Lebel, C. (2022). Cumulative effects of pre-pandemic vulnerabilities and pandemic-  
42 related hardship on psychological distress among pregnant individuals. *General Hospital*  
43 *Psychiatry* (e-pub ahead of print). <https://doi.org/10.1016/j.genhosppsy.2023.04.016>  
44  
45 [28] Matsumura, K., Hamazaki, K., Tsuchida, A., Kasamatsu, H., Inadera, H., & Japan  
46 Environment and Children's Study (JECS) Group. (2019). Education level and risk of  
47 postpartum depression: Results from the Japan Environment and Children's Study  
48 (JECS). *BMC Psychiatry*, 19(1), 419. <https://doi.org/10.1186/s12888-019-2401-3>  
49  
50  
51  
52  
53  
54  
55  
56  
57  
58  
59  
60

- 1  
2  
3 [29] Bowen, A., Bowen, R., Maslany, G., & Muhajarine, N. (2008). Anxiety in a socially high-  
4 risk sample of pregnant women in Canada. *Canadian Journal of Psychiatry*, 53(7), 435-  
5 430. <https://doi.org/10.1177/070674370805300708>  
6  
7  
8 [30] Statistics Canada. (2021). Indigenous population continues to grow and is much younger  
9 than the non-Indigenous population, although the pace of growth has slowed. *Statistics*  
10 *Canada*. Retrieved from [https://www150.statcan.gc.ca/n1/daily-](https://www150.statcan.gc.ca/n1/daily-quotidien/220921/dq220921a-eng.htm)  
11 [quotidien/220921/dq220921a-eng.htm](https://www150.statcan.gc.ca/n1/daily-quotidien/220921/dq220921a-eng.htm)  
12  
13 [31] Toombs, E., Lund, J., & Mushquash, C. J. (2022). Adverse childhood experiences (ACEs)  
14 are increasing in indigenous populations in Canada: Now what? *Canadian Psychology /*  
15 *Psychologie Canadienne*, 63(4), 576. <https://doi.org/10.1037/cap0000331>  
16  
17 [32] Bowen, A., Stewart, N., Baetz, M., & Muhajarine, N. (2009). Antenatal depression in  
18 socially high-risk women in Canada. *Journal of Epidemiology & Community Health*,  
19 63(5), 414–416. <https://doi.org/10.1136/jech.2008.078832>  
20  
21 [33] Giesbrecht, G. F., Bagshawe, M., van Sloten, M., MacKinnon, A. L., Dhillon, A., van de  
22 Wouw, M. Vaghef-Mehrabany, E., Rojas, L., Cattani, D., Lebel, C., & Tomfohr-Madsen,  
23 L. (2021). Protocol for the pregnancy during the COVID-19 pandemic (PdP) study: A  
24 longitudinal cohort study of mental health among pregnant Canadians during the  
25 COVID-19 pandemic and developmental outcomes in their children. *JMIR Research*  
26 *Protocols*, 10(4). <https://doi.org/10.2196/25407>  
27  
28 [34] Khoury, J. E., Atkinson, L., Bennett, T., Jack, S. M., & Gonzalez, A. (2021). COVID-19  
29 and mental health during pregnancy: The importance of cognitive appraisal and social  
30 support. *Journal of Affective Disorders*, 282, 1161-1169.  
31 <https://doi.org/10.1016/j.jad.2021.01.027>  
32  
33 [35] Richardson, L., & Crawford, A. (2020). Covid-19 and the decolonization of Indigenous  
34 public health. *Canadian Medical Association Journal*, 193(38).  
35 <https://doi.org/10.1503/cmaj.200852>  
36  
37 [36] Shah, P. S., Zao, J., Al-Wassia, H., & Shah, V. (2011). Pregnancy and neonatal outcomes of  
38 Aboriginal women: A systemic review and meta-analysis. *Women's Health Issues*, 21(1),  
39 28-30. <https://doi.org/10.1016/j.whi.2010.08.005>  
40  
41 [37] Wenman, W. M., Joffres, M. R., & Tataryn, I. V. (2004). A prospective cohort study of  
42 pregnancy risk factors and birth outcomes in Aboriginal women. *Canadian Medical*  
43 *Association Journal*, 171(6), 585-589. <https://doi.org/10.1503/cmaj.1031730>  
44  
45 [38] Cox, R. G., Zhang, L., & Zotti, M. E. (2011). Prenatal care utilization in Mississippi: Racial  
46 disparities and implications for unfavorable birth outcomes. *Maternal and Child Health*  
47 *Journal*, 15, 931–942. <https://doi.org/10.1007/s10995-009-0542-6>  
48  
49  
50  
51  
52  
53  
54  
55  
56  
57  
58  
59

- [39] World Health Organization. (2015). Coronavirus disease (COVID-19) pandemic. *World Health Organization*. Retrieved from [https://www.who.int/emergencies/diseases/novel-coronavirus-2019?adgroupsurvey={adgroupsurvey}&gclid=Cj0KCQjwqoibBhDUARIsAH2OpWg7LF8VOzjaOhcblG19HYFfxwtM-waYjs7kg8W3U2z5Im7el1wEQFRsaAm4BEALw\\_wcB](https://www.who.int/emergencies/diseases/novel-coronavirus-2019?adgroupsurvey={adgroupsurvey}&gclid=Cj0KCQjwqoibBhDUARIsAH2OpWg7LF8VOzjaOhcblG19HYFfxwtM-waYjs7kg8W3U2z5Im7el1wEQFRsaAm4BEALw_wcB)
- [40] Carlin, E., Seear, K. H., Ferrari, K., Spry, E., Atkinson, D., & Marley, J. V. (2020). Risk and resilience: a mixed methods investigation of Aboriginal Australian women's perinatal mental health screening assessments. *Social Psychiatry and Psychiatric Epidemiology*, *56*, 547-557. <https://doi.org/10.1007/s00127-020-01986-7>
- [41] Ilska, M., & Przybyla-Basista, H. (2019). The role of partner support, ego-resiliency, prenatal attitudes towards maternity and pregnancy in psychological well-being of women in high-risk and low-risk pregnancy. *Psychology, Health & Medicine*, *25*(5), 630-638. <https://doi.org/10.1080/13548506.2020.1737718>
- [42] Firouzbakht, M., Rahmani, N., Sharif Nia, H., & Omidvar, S. (2022). Coping strategies and depression during the COVID-19 pandemic in pregnant women: a cross sectional study. *BMC psychiatry*, *22*(1), 1-8. <https://doi.org/10.1186/s12888-022-03792-8>
- [43] Penengo, C., Colli, C., Cesco, M., Crocchia, V., Degano, M., Ferreghini, A., ... & Balestrieri, M. (2022). Stress, coping, and psychiatric symptoms in pregnant women in outpatient care during the 2021 second-wave COVID-19 pandemic. *Frontiers in Psychiatry*, *12*, 2461. <https://doi.org/10.3389/fpsy.2021.775585>
- [44] Wheeler, Misra, D. P., & Giurgescu, C. (2021). Stress and coping among pregnant black women during the COVID-19 pandemic. *Public Health Nursing (Boston, Mass.)*, *38*(4), 596-602. <https://doi.org/10.1111/phn.12909>
- [45] Rieger, K. L., & Heaman, M. I. (2016). Factors associated with high levels of perceived prenatal stress among inner-city women. *Journal of Obstetric, Gynecologic & Neonatal Nursing*, *45*(2), 180-195. <https://doi.org/10.1016/j.jogn.2015.12.005>
- [46] Owais, S., Faltyn, M., Johnson, A. V., Gabel, C., Downey, B., Kates, N., & Van Lieshout, R. J. (2020). The perinatal mental health of indigenous women: a systematic review and meta-analysis. *The Canadian Journal of Psychiatry*, *65*(3), 149-163. <https://doi.org/10.1177/0706743719877029>
- [47] Niccols, A., Dell, C. A., & Clarke, S. (2010). Treatment issues for Aboriginal mothers with substance use problems and their children. *International journal of mental health and addiction*, *8*, 320-335. <https://doi.org/10.1007/s11469-009-9255-8>
- [48] Ritland, L., Jongbloed, K., Mazzuca, A., Thomas, V., Richardson, C. G., Spittal, P. M., & Guhn, M. (2020). Culturally safe, strengths-based parenting programs supporting Indigenous families impacted by substance use—a scoping review. *International Journal*

- 1  
2  
3  
4  
5  
6  
7  
8  
9  
10  
11  
12  
13  
14  
15  
16  
17  
18  
19  
20  
21  
22  
23  
24  
25  
26  
27  
28  
29  
30  
31  
32  
33  
34  
35  
36  
37  
38  
39  
40  
41  
42  
43  
44  
45  
46  
47  
48  
49  
50  
51  
52  
53  
54  
55  
56  
57  
58  
59  
60
- of Mental Health and Addiction*, 18, 1586-1610. <https://doi.org/10.1007/s11469-020-00237-9>
- [49] Roy, A. (2019). Intergenerational Trauma and Aboriginal Women: Implications for Mental Health During Pregnancy 1. *First Peoples Child & Family Review*, 14(1), 211-224. <https://doi.org/10.7202/1071297ar>
- [50] Shahram, S. Z., Bottorff, J. L., Oelke, N. D., Kurtz, D. L., Thomas, V., Spittal, P. M., & and For the Cedar Project Partnership. (2017). Mapping the social determinants of substance use for pregnant-involved young aboriginal women. *International Journal of Qualitative Studies on Health and Well-Being*, 12(1), 1275155. <https://doi.org/10.1080/17482631.2016.1275155>
- [51] Kovach, M. (2010). *Indigenous methodologies: Characteristics, conversations, and contexts*. University of Toronto Press.
- [52] Cox, J. L., Holden, J. M., & Sagovsky, R. (1987). Detection of postnatal depression: Development of the 10-item Edinburgh Postnatal Depression Scale. *British Journal of Psychiatry*, 150(6), 782-786. <https://doi.org/10.1192/bjp.150.6.782>
- [53] Pilkonis, P. A., Choi, S. W., Reise, S. P., Stover, A. M., Riley, W. T., Cella, D., & PROMIS Cooperative Group. (2011). Item banks for measuring emotional distress from the Patient-Reported Outcomes Measurement Information System (PROMIS): Depression, anxiety, and anger. *Assessment*, 18(3), 263-83. <https://doi.org/10.1177/1073191111411667>
- [54] Rini C.K., Dunkel Schetter C., Hobel C., Glynn L., Sandman C.A. (2006). Effective social support: Antecedents and consequences of partner support during pregnancy. *Pers. Relationships*, 13(2), 207–229. <https://doi.org/10.1111/j.1475-6811.2006.00114.x>
- [55] Cohen S., Hoberman H. (1983) Positive events and social supports as buffers of life change stress. *Journal of Applied. Social. Psychology* 13, 99–125. <https://doi.org/10.1111/j.1559-1816.1983.tb02325.x>
- [56] Aftyka, A., Rozalska, I., Pawlak, A., Mazur, A., Bednarek, A., & Zarzycka, D. (2019). Internal consistency and accuracy of Interpersonal Support Evaluation List (ISEL-40) in mothers of healthy children and those with a medical history. *Annals of Agricultural and Environmental Medicine*, 26(1). <https://doi.org/10.26444/aaem/91783>
- [57] Braun, V., & Clarke, V. (2008). Using thematic analysis in psychology. *Qualitative Research in Psychology*, 3(2), 77–101. <https://doi.org/10.1191/1478088706qp063oa>
- [58] Delve. (2020). Introduction to qualitative coding with Delve. [PowerPoint Slides]. <https://documentcloud.adobe.com/link/review?uri=urn:aaid:scds:US:660c0e6d-45bf-4c00-8752-3a6139414feb>

- 1  
2  
3  
4 [59] Ali, S. A., Dero, A. A., Ali, S. A., & Ali, G. B. (2018). Factors affecting the utilization of  
5 antenatal care among pregnant women: a literature review. *J Preg Neonatal Med*, 2(2).  
6 <https://doi.org/10.35841/neonatal-medicine.2.2.41-45>  
7  
8  
9 [60] Aranda, Z., Binde, T., Tashman, K., Tadikonda, A., Mawindo, B., Maweu, D., Boley, E. J.,  
10 Mphande, I., Dumbuya, I., Montaña, M., Clisbee, M., Mvula, M. G., Ndayizigiye, M.,  
11 Jean-Baptiste, M. C., Varney, P. F., Anyango, S., Grépin, K. A., Law, M. R., Mugunga, J.  
12 C., ... Fulcher, I. R. (2022). Disruptions in maternal health service use during the COVID-  
13 19 pandemic in 2020: Experiences from 37 health facilities in low-income and middle-  
14 income countries. *BMJ Global Health*, 7(1), e007247. <https://doi.org/10.1136/bmjgh-2021-007247>  
15  
16  
17  
18 [61] Bayrampour, H., Tamana, S. K., & Boutin, A. (2022). Pregnant people's responses to the  
19 COVID-19 pandemic: a mixed-methods, descriptive study. *Canadian Medical Association*  
20 *Open Access Journal*, 10(1), E146-E154. <https://doi.org/10.9778/cmajo.20210136>  
21  
22  
23 [62] Brislane, Á., Larkin, F., Jones, H., & Davenport, M. H. (2021). Access to and quality of  
24 healthcare for pregnant and postpartum women during the COVID-19 pandemic.  
25 *Frontiers in Global Women's Health*, 2, 628625.  
26 <https://doi.org/10.3389/fgwh.2021.628625>  
27  
28  
29 [63] Kotlar, B., Gerson, E., Petrillo, S., Langer, A., & Tiemeier, H. (2021). The impact of the  
30 COVID-19 pandemic on maternal and perinatal health: a scoping review. *Reproductive*  
31 *health*, 18, 1-39. <https://doi.org/10.1186/s12978-021-01070-6>  
32  
33  
34 [64] Liu, C. H., Koire, A., Erdei, C., & Mittal, L. (2021). Unexpected changes in birth  
35 experiences during the COVID-19 pandemic: Implications for maternal mental health.  
36 *Archives of gynecology and obstetrics*, 1-11. <https://doi.org/10.1007/s00404-021-06310-5>  
37  
38 [65] American College of Obstetricians and Gynecologists. (2006). Psychosocial risk factors:  
39 perinatal screening and intervention. *Obstetrics and Gynecology*, 108, 469-477.  
40 <https://doi.org/10.1097/00006250-200608000-00046>  
41  
42  
43 [66] Geller, P. A. (2004). Pregnancy as a stressful life event. *CNS spectrums*, 9(3), 188-197.  
44 <https://doi.org/10.1017/s1092852900008981>  
45  
46 [67] Kingston, D., Heaman, M., Fell, D., Dzakpasu, S., & Chalmers, B. (2012). Factors  
47 associated with perceived stress and stressful life events in pregnant women: findings  
48 from the Canadian Maternity Experiences Survey. *Maternal and child health journal*, 16,  
49 158-168. <https://doi.org/10.1007/s10995-010-0732-2>  
50  
51 [68] Cameron, E. E., Joyce, K. M., Delaquis, C. P., Reynolds, K., Protudjer, J. L., & Roos, L. E.  
52 (2020). Maternal psychological distress & mental health service use during the COVID-  
53 19 pandemic. *Journal of affective disorders*, 276, 765-774.  
54 <https://doi.org/10.1016/j.jad.2020.07.081>  
55  
56  
57  
58  
59

- 1  
2  
3  
4 [69] Rudrum, S. (2021). Pregnancy during the global COVID-19 pandemic: Canadian  
5 experiences of care. *Frontiers in Sociology*, 6, 611324.  
6 <https://doi.org/10.3389/fsoc.2021.611324>  
7  
8  
9 [70] Stirling Cameron, E., Ramos, H., Aston, M., Kuri, M., & Jackson, L. (2021). “COVID  
10 affected us all:” the birth and postnatal health experiences of resettled Syrian refugee  
11 women during COVID-19 in Canada. *Reproductive health*, 18, 1-11.  
12 <https://doi.org/10.1186/s12978-021-01309-2>  
13  
14  
15 [71] Maslow, A. H. (1943). A theory of human motivation. *Psychological review*, 50(4), 370-  
16 396. <https://doi.org/10.1037/h0054346>  
17  
18 [72] Hajizadeh, M., Hu, M., Bombay, A., & Asada, Y. (2018). Socioeconomic inequalities in  
19 health among Indigenous peoples living off-reserve in Canada: Trends and determinants.  
20 *Health Policy*, 122, 854-865. <https://doi.org/10.1016/j.healthpol.2018.06.011> 0168-8510  
21  
22  
23 [73] Truth and Reconciliation Commission of Canada. (2015). Honouring the trust and  
24 reconciling for the future: Summary of the final report of the Truth and Reconciliation  
25 Commission of Canada. *The Truth and Reconciliation Commission of Canada*. Retrieved  
26 from: [https://ehprnh2mwo3.exactdn.com/wp-](https://ehprnh2mwo3.exactdn.com/wp-content/uploads/2021/01/Executive_Summary_English_Web.pdf)  
27 [content/uploads/2021/01/Executive\\_Summary\\_English\\_Web.pdf](https://ehprnh2mwo3.exactdn.com/wp-content/uploads/2021/01/Executive_Summary_English_Web.pdf)  
28  
29  
30 [74] Bedaso, A., Adams, J., Peng, W., & Sibbritt, D. (2021). The relationship between social  
31 support and mental health problems during pregnancy: A systematic review and meta-  
32 analysis. *Reproductive Health*, 18(1), 162. <https://doi.org/10.1186/s12978-021-01209-5>  
33  
34 [75] Leach, L. S., Poyser, C., & Fairweather-Schmidt, K. (2017). Maternal perinatal anxiety: A  
35 review of prevalence and correlates. *Clinical Psychologist*, 21(1), 4–19.  
36 <https://doi.org/10.1111/cp.12058>  
37  
38  
39 [76] Westdahl, C., Milan, S., Magriples, U., Kershaw, T. S., Rising, S. S., & Ickovics, J. R.  
40 (2007). Social Support and Social Conflict as Predictors of Prenatal Depression.  
41 *Obstetrics and Gynecology*, 110(1), 134–140.  
42 <https://doi.org/10.1097/01.AOG.0000265352.61822.1b>  
43  
44  
45 [77] Prime, H., Wade, M., & Browne, D. T. (2020). Risk and resilience in family well-being  
46 during the COVID-19 pandemic. *American Psychologist*, 75(5), 631–643.  
47 <https://doi.org/10.1037/amp0000660>  
48  
49 [78] Daugherty, J. C., Bueso-Izquierdo, N., Lara-Cinisomo, S., Lozano-Ruiz, A., & Caparros-  
50 Gonzalez, R. A. (2022). Partner relationship quality, social support and maternal stress  
51 during pregnancy and the first COVID-19 lockdown. *Journal of Psychosomatic*  
52 *Obstetrics & Gynecology*, 43(4), 563–573.  
53 <https://doi.org/10.1080/0167482X.2022.2101446>  
54  
55  
56  
57  
58  
59



- 1  
2  
3 [79] Farewell, C. V., Thayer, Z., Paulson, J., Nicklas, J., Walker, C., Waldie, K., Morton, S., &  
4 Leiferman, J. A. (2022). Fostering Resilience Among Mothers Early (FRAME): Using  
5 growth mixture modeling to identify resources that mitigate perinatal depression.  
6 *Archives of Women's Mental Health*, 25(2), 451–461. [https://doi.org/10.1007/s00737-](https://doi.org/10.1007/s00737-022-01211-1)  
7 [022-01211-1](https://doi.org/10.1007/s00737-022-01211-1)  
8  
9  
10 [80] Kinser, P., Jallo, N., Moyer, S., Weinstock, M., Barrett, D., Mughal, N., ... & Rider, A.  
11 (2022). “It's always hard being a mom, but the pandemic has made everything harder”: A  
12 qualitative exploration of the experiences of perinatal women during the COVID-19  
13 pandemic. *Midwifery*, 109, 103313. <https://doi.org/10.1016/j.midw.2022.103313>  
14  
15  
16 [81] Ahmad, M., & Vismara, L. (2021). The psychological impact of COVID-19 pandemic on  
17 women's mental health during pregnancy: A rapid evidence review. *International*  
18 *Journal of Environmental Research and Public Health*, 18(13), 7112.  
19 <https://doi.org/10.3390/ijerph18137112>  
20  
21  
22 [82] Black, K. A., MacDonald, I., Chambers, T., & Ospina, M. B. (2019). Postpartum mental  
23 health disorders in indigenous women: A systematic review and meta-analysis. *Journal of*  
24 *Obstetrics and Gynaecology Canada*, 41(10), 1470-1478.  
25 <https://doi.org/10.1016/j.jogc.2019.02.009>  
26  
27  
28 [83] Nerestant, A. (2021, October 5). *If Joyce Echaquan were white, she would still be alive*,  
29 *Quebec Coroner says* | CBC News. CBCnews. Retrieved March 27, 2023, from  
30 [https://www.cbc.ca/news/canada/montreal/echaquan-coroner-report-health-care-system-](https://www.cbc.ca/news/canada/montreal/echaquan-coroner-report-health-care-system-racism-1.6199964)  
31 [racism-1.6199964](https://www.cbc.ca/news/canada/montreal/echaquan-coroner-report-health-care-system-racism-1.6199964)  
32  
33  
34 [84] Lazarus, R. S., & Folkman, S. (1984). *Stress, appraisal, and coping*. Springer.  
35  
36 [85] Blackstock, C. (2011). The emergence of the breath of life theory. *Journal of Social Work*  
37 *Values and Ethics*, 8(1), 1-16.  
38  
39 [86] Statistics Canada (2022). Median after-tax income, median market income and median  
40 government transfers for families and unattached individuals. *Statistics Canada*.  
41 Retrieved from [https://www150.statcan.gc.ca/n1/daily-quotidien/220323/cg-a001-](https://www150.statcan.gc.ca/n1/daily-quotidien/220323/cg-a001-eng.htm)  
42 [eng.htm](https://www150.statcan.gc.ca/n1/daily-quotidien/220323/cg-a001-eng.htm)  
43  
44  
45 [87] Statistics Canada. (2019). Results from the 2016 Census: Housing, income and residential  
46 dissimilarity among Indigenous people in Canadian cities. *Statistics Canada*. Retrieved  
47 from <https://www150.statcan.gc.ca/n1/pub/75-006-x/2019001/article/00018-eng.htm>  
48  
49 [88] Lux, M. (1998). Perfect subjects: Race, tuberculosis, and the Qu'Appelle BCG Vaccine  
50 Trial. *Canadian Bulletin of Medical History*, 15(2), 277-295.  
51 <https://doi.org/10.3138/cbmh.15.2.277>  
52  
53  
54  
55  
56  
57  
58  
59

1  
2  
3 [89] Mosby, I. (2013). Administering colonial science: Nutrition research and human biomedical  
4 experimentation in Aboriginal communities and residential schools, 1942–1952. *Histoire*  
5 *sociale/Social history*, 46(1), 145-172. <https://doi.org/10.1353/his.2013.0015>  
6  
7  
8  
9  
10  
11  
12  
13  
14  
15  
16  
17  
18  
19  
20  
21  
22  
23  
24  
25  
26  
27  
28  
29  
30  
31  
32  
33  
34  
35  
36  
37  
38  
39  
40  
41  
42  
43  
44  
45  
46  
47  
48  
49  
50  
51  
52  
53  
54  
55  
56  
57  
58  
59  
60

# BMJ Open

## Original Research: Mixed Methods Study Exploring Health Service Access and Social Support Linkage to the Mental Wellbeing of Canadian Indigenous Pregnant Persons during the COVID-19 Pandemic

|                                 |                                                                                                                                                                                                                                                                                                                                                                                                                                                                                                                                                                                                                                                                                                                                                                                                          |
|---------------------------------|----------------------------------------------------------------------------------------------------------------------------------------------------------------------------------------------------------------------------------------------------------------------------------------------------------------------------------------------------------------------------------------------------------------------------------------------------------------------------------------------------------------------------------------------------------------------------------------------------------------------------------------------------------------------------------------------------------------------------------------------------------------------------------------------------------|
| Journal:                        | <i>BMJ Open</i>                                                                                                                                                                                                                                                                                                                                                                                                                                                                                                                                                                                                                                                                                                                                                                                          |
| Manuscript ID                   | bmjopen-2023-078388.R1                                                                                                                                                                                                                                                                                                                                                                                                                                                                                                                                                                                                                                                                                                                                                                                   |
| Article Type:                   | Original research                                                                                                                                                                                                                                                                                                                                                                                                                                                                                                                                                                                                                                                                                                                                                                                        |
| Date Submitted by the Author:   | 23-Jan-2024                                                                                                                                                                                                                                                                                                                                                                                                                                                                                                                                                                                                                                                                                                                                                                                              |
| Complete List of Authors:       | Mollons, Meghan; University of Manitoba, Psychology<br>Levasseur-Puhach, Sydney; University of Manitoba, Psychology<br>Kaur, Jasleen; University of Calgary, Psychology<br>Doyle, Jennifer; The University of British Columbia, Educational and Counselling Psychology<br>Giesbrecht, Gerald ; Alberta Children's Hospital Research Institute; University of Calgary, Department of Community Health Sciences<br>Lebel, Catherine; University of Calgary, Department of Radiology; Alberta Children's Hospital Research Institute<br>Woods, Lindsay; New Directions<br>Tomfohr-Madsen, Lianne; The University of British Columbia, Educational and Counselling Psychology<br>Roos, Leslie; University of Manitoba, Psychology; University of Manitoba Children's Hospital Research Institute of Manitoba |
| <b>Primary Subject Heading</b>: | Health services research                                                                                                                                                                                                                                                                                                                                                                                                                                                                                                                                                                                                                                                                                                                                                                                 |
| Secondary Subject Heading:      | Public health, Mental health                                                                                                                                                                                                                                                                                                                                                                                                                                                                                                                                                                                                                                                                                                                                                                             |
| Keywords:                       | COVID-19, OBSTETRICS, Social Support, MENTAL HEALTH                                                                                                                                                                                                                                                                                                                                                                                                                                                                                                                                                                                                                                                                                                                                                      |
|                                 |                                                                                                                                                                                                                                                                                                                                                                                                                                                                                                                                                                                                                                                                                                                                                                                                          |

SCHOLARONE™  
Manuscripts



I, the Submitting Author has the right to grant and does grant on behalf of all authors of the Work (as defined in the below author licence), an exclusive licence and/or a non-exclusive licence for contributions from authors who are: i) UK Crown employees; ii) where BMJ has agreed a CC-BY licence shall apply, and/or iii) in accordance with the terms applicable for US Federal Government officers or employees acting as part of their official duties; on a worldwide, perpetual, irrevocable, royalty-free basis to BMJ Publishing Group Ltd ("BMJ") its licensees and where the relevant Journal is co-owned by BMJ to the co-owners of the Journal, to publish the Work in this journal and any other BMJ products and to exploit all rights, as set out in our [licence](#).

The Submitting Author accepts and understands that any supply made under these terms is made by BMJ to the Submitting Author unless you are acting as an employee on behalf of your employer or a postgraduate student of an affiliated institution which is paying any applicable article publishing charge ("APC") for Open Access articles. Where the Submitting Author wishes to make the Work available on an Open Access basis (and intends to pay the relevant APC), the terms of reuse of such Open Access shall be governed by a Creative Commons licence – details of these licences and which [Creative Commons](#) licence will apply to this Work are set out in our licence referred to above.

Other than as permitted in any relevant BMJ Author's Self Archiving Policies, I confirm this Work has not been accepted for publication elsewhere, is not being considered for publication elsewhere and does not duplicate material already published. I confirm all authors consent to publication of this Work and authorise the granting of this licence.

1  
2  
3 **Original Research: Mixed Methods Study Exploring Health Service Access and Social**  
4 **Support Linkage to the Mental Wellbeing of Canadian Indigenous Pregnant Persons**  
5 **during the COVID-19 Pandemic**  
6

7  
8 Meghan O. Mollons<sup>1</sup>, Sydney Levasseur-Puhach<sup>1</sup>, Jasleen Kaur<sup>2</sup>, Jennifer Doyle<sup>3</sup>, Gerald  
9 Giesbrecht<sup>4,5</sup>, Catherine Lebel<sup>6</sup>, Lindsay Woods<sup>7</sup>, Lianne Tomfohr-Madsen\*<sup>3</sup>, Leslie E.  
10 Roos\*<sup>1,8,9</sup>  
11

12  
13 <sup>1</sup>Department of Psychology, University of Manitoba, Winnipeg, Manitoba, Canada, R3T 2N

14 <sup>2</sup>Department of Psychology, University of Calgary, Calgary, Alberta, Canada, T2N 1N4

15 <sup>3</sup>Department of Educational and Counselling Psychology, and Special Education, University of British Columbia,  
16 Vancouver, British Columbia, V6T 1Z4

17 <sup>4</sup>Departments of Pediatrics and Community Health Sciences, University of Calgary, Calgary, Alberta, Canada, T2N  
18 1N4

19 <sup>5</sup>Owerko Center at the Alberta Children's Hospital Research Institute, Calgary, Alberta, Canada, T2N 1N4

20 <sup>6</sup>Department of Radiology, Alberta Children's Hospital Research Institute, University of Calgary, Calgary, Alberta,  
21 Canada, T2N 1N4

22 <sup>7</sup>New Directions, Winnipeg, Manitoba, Canada, R3G 0M8

23 <sup>8</sup>Children's Hospital Research Institute of Manitoba, Winnipeg, Manitoba, Canada, R3E 3P4

24 <sup>9</sup>Rady Faculty of Health Sciences, University of Manitoba, Winnipeg, Manitoba, Canada, R3E 0W2  
25

26 \*co-senior authorship  
27  
28

29 Corresponding author: Meghan O. Mollons; University of Manitoba; [mollonsm@myumanitoba.ca](mailto:mollonsm@myumanitoba.ca)  
30  
31

32 **The authors declare no conflict of interest.**  
33  
34  
35  
36  
37  
38  
39  
40  
41  
42  
43  
44  
45  
46  
47  
48  
49  
50  
51  
52  
53  
54  
55  
56  
57  
58  
59  
60

## ABSTRACT

**Objectives** to explore how the unprecedented stressors associated with the COVID-19 pandemic may have contributed to heightened levels of depression and anxiety amongst pregnant Indigenous persons and identify protective individual-level factors.

**Design** The current study used a mixed-methods design including standardized questionnaires and open-ended response questions. Using hierarchical regression models, we examined the extent to which COVID-related factors of service disruption (i.e., changes to prenatal care, changes to birth plans, and social support) were associated with mental wellbeing. Further, through qualitative analyses on open-ended coping questions, we examined the coping strategies utilized by pregnant Indigenous persons in response to the pandemic.

**Setting** Participants responded to an online questionnaire consisting of standardized measures from 2020-2021.

**Participants** The study included 336 self-identifying Indigenous pregnant persons in Canada

**Results** Descriptive results revealed elevated rates of clinically relevant depression (52.7%) and anxiety (62.5%) symptoms among this population. 76.8% of participants reported prenatal care service disruptions, including appointment cancellations. Thematic analyses identified coping themes of staying informed, social and/or cultural connections and activities, and internal mental wellbeing strategies. Disruptions to services and decreased quality of prenatal care negatively impacted mental wellbeing of Indigenous persons during the COVID-19 pandemic.

**Conclusions** Given the potential for mental wellbeing challenges to persist, and long-term effects of perinatal distress, it is important to examine the quality of care that pregnant individuals receive. Service providers should advance policies and practices that promote relationship quality and health system engagement as key factors linked to wellbeing during the perinatal period, for Indigenous persons.

*Keywords:* Prenatal care, Indigenous health, Indigenous pregnancy, service provision, COVID-19

### **Strengths and limitations of this study:**

- This study includes important implications for the perinatal healthcare access and service provisions for Indigenous persons in Canada.
- The findings from this study discuss the resiliency and coping strategies utilized by Indigenous persons in Canada to counter barriers in the healthcare system during the height of the COVID-19 pandemic.
- The participant sample largely consists of participants with a higher than Canadian average median income, which may limit the transferability of findings to the larger population.
- This study lacked the incorporation of traditional birthing and healing practices when assessing healthcare service usage for Indigenous pregnant persons.

1  
2  
3 Supportive and ongoing prenatal care is vital to optimize pregnancy outcomes [1,2,3],  
4 with regular and secure access to high-quality prenatal care supporting the mental and physical  
5 health of the pregnant person, thereby increasing the likelihood of birthing a healthy child [4,5].  
6 By providing education, counselling, and emotional support, prenatal care can help pregnant  
7 people maintain their overall well-being and promote positive outcomes [5]. Establishing a long-  
8 term relationship with care providers also ensures consistent and coordinated care, builds trust  
9 and improves communication, allows for more personalized care, and promotes positive health  
10 outcomes for the birthing parent and baby [6,7].

11  
12 The COVID-19 pandemic brought widespread health restrictions, limiting people's  
13 access to health care practitioners and services, including prenatal care [8,9]. Pandemic related  
14 stressors, including service restrictions, have been associated with an increase in emotional  
15 distress in individuals experiencing pregnancies [10]. Due to the historical and ongoing impacts  
16 of colonialism, Indigenous Peoples of Canada already experience tremendous health inequities,  
17 including restricted access to healthcare [11,12]. Access to pregnancy- specific healthcare  
18 services is also impacted by issues such as cultural misalignment, distance to services, cost, lack  
19 of transport, and lack of awareness of available services [13,14]. Additionally concerning are the  
20 ways in which distrust of systems of support and systemic racism can impede access to care. In  
21 Canada, a deficit-based discourse around Indigenous health has contributed to stigmatization,  
22 discrimination, and marginalization of Indigenous Peoples' [15, 16]. Consequently, this leads to  
23 a lack of trust in the healthcare system, making pregnant Indigenous persons less likely to seek  
24 care [17].

25  
26 As a result of the COVID-19 pandemic, prenatal care was restricted across Canada, with  
27 some individuals experiencing limited or complete loss of access to their primary health care  
28 providers, obstetricians, and/or midwives, and limited social support during their pregnancies  
29 [18,2]. A lack of a culturally aligned pandemic response, created additional barriers for  
30 pregnancy Indigenous persons [19]. Smylie and colleagues (2021) found that even pre-pandemic,  
31 Indigenous peoples had to travel away from their home communities more often for prenatal  
32 care, particularly birthing, highlighting disparities in care accessibility. Coupled with a lack of  
33 social support and ongoing systemic racism, this resulted in increased stress levels for pregnant  
34 Indigenous persons [20].

### 35 36 37 38 39 **Mental Wellbeing in the Prenatal period**

40  
41 Pregnancy is a time of major change for individuals, both physically and psychologically,  
42 and is often associated with increased feelings of stress [21,22]. Substantial research has  
43 demonstrated heightened levels of prenatal depression and anxiety experienced during the  
44 COVID-19 pandemic compared to pre-pandemic [23,24,25,26,27]. Pregnant individuals with  
45 specific sociodemographic factors, such as decreased income and lower education levels, are  
46 more vulnerable to adverse mental wellbeing symptoms during pregnancy [28,29,30]. Canadian  
47 Indigenous populations are at a particular disadvantage in this regard [31] due to the economic  
48 disadvantages they experience as a result of continuing legacies of colonialism [11]. Across  
49 Canada, approximately one-in-five Indigenous persons live in poverty and one-in-six experience  
50 difficulties with their current form of housing [32]. In addition to these economic disparities,  
51 Indigenous persons are also between one-and-a-half to five times as likely to experience trauma-  
52 inducing experiences such as childhood abuse and intimate partner violence [33]. Maintaining  
53 positive mental wellbeing and low stress levels can have positive health outcomes for both the  
54 pregnant individual and their developing baby [22]. This can prove difficult for Indigenous  
55  
56  
57  
58  
59

1  
2  
3 communities who already face barriers in accessing proper prenatal care and mental wellbeing  
4 support [34,26].  
5

### 6 7 **Service Disruptions**

8 Adequate and accessible service provisions are vital to the health and wellbeing of  
9 pregnant persons. Groulx and colleagues (2021) noted that service disruptions increased mental  
10 wellbeing concerns among Canadian pregnant individuals. While social distancing and virtual  
11 doctor appointments have been the primary alternative for health services in Canada [35, 36],  
12 this requires individuals to have adequate housing, reliable internet access, and access to  
13 electronic devices, most of which is not easily accessible to a large portion of the population,  
14 particularly in many Indigenous communities [37] which face significantly more barriers in  
15 accessing medical care, specifically prenatal care, than non-Indigenous populations, [38, 26],  
16 including forced travel from home communities to larger cities to give birth. This further restricts  
17 social support availability and access to adequate health care [26]. Long-distance travel for  
18 birthing has increased during the COVID-19 pandemic as obstetrical and health services were  
19 closed [26]. Indigenous persons who are pregnant face poorer birth outcomes, including higher  
20 rates of low-birthweight, preterm birth, and stillbirth [38,39], related to the racial disparities in  
21 access to and quality of prenatal care [40].  
22  
23  
24

### 25 26 **Social Support**

27 The World Health Organization (2015) reports that community support and engagement  
28 is largely impactful to positive outcomes among pregnant people. Social support, specifically  
29 partner support, has been cited as a resiliency factor for pregnant individuals, particularly those  
30 with high-risk pregnancies [41,42,26]. Social support during the prenatal period can mitigate  
31 adverse mental wellbeing outcomes for pregnant individuals, and subsequently, developmental  
32 outcomes for their babies, such as low birthweight [41,22,36]. However, due to the COVID-19  
33 pandemic, support persons were frequently not allowed to join doctor appointments or had  
34 limited involvement in the birthing process, adding to the stress levels of pregnant individuals  
35 [2,26].  
36  
37

### 38 39 **Coping Strategies**

40 Commonly used coping strategies for pregnant people during the pandemic include  
41 avoidance, connection with spirituality, and preparation [43,44,45]. For Indigenous persons  
42 specifically, perinatal stress can be experienced at a greater intensity than in other demographics  
43 [46,47]. However, reported coping strategies in the literature generally focus on substance use as  
44 a coping method, in the context of pregnant Indigenous persons [48,49,50,51].  
45

### 46 47 **Current Study**

48 There is limited knowledge on the impacts of prenatal service disruption due to the  
49 COVID-19 pandemic on pregnant Indigenous persons, and how changes to birth plans and  
50 support levels have impacted the mental wellbeing of individuals pregnant during the COVID-19  
51 pandemic. The objectives of the present study were to (1) examine mental wellbeing (i.e.,  
52 anxiety and depression symptoms) among a sample of pregnant Indigenous persons during the  
53 COVID-19 pandemic, (2) to examine the associations of pandemic related service disruptions  
54 (i.e., changes to prenatal care, changes to birth plans) and social support with mental wellbeing,  
55 and (3) to generate knowledge on Indigenous pregnant peoples self-described coping strategies,  
56  
57  
58  
59



1  
2  
3 as they relate to the mental wellbeing of this population. This mixed-methods study aims to  
4 further develop an understanding of both adaptive and maladaptive coping strategies used among  
5 Indigenous pregnant persons throughout the pandemic. Obtaining this information may be done  
6 most appropriately using a qualitative approach based on literature suggesting that these methods  
7 are most ethically aligned with culturally safe research practices [52].  
8  
9

## 10 11 **Methods**

### 12 **Participants**

13 The current study reports data collected from the Pregnancy During the COVID-19  
14 Pandemic study [2], an ongoing longitudinal study examining the health impacts of the COVID-  
15 19 pandemic on pregnant individuals and their children. Participants were recruited from April  
16 2020-2021 through online recruitment methods, including social media posts and ads on  
17 Facebook, Instagram, and Twitter. Participants were invited to join the study if they met the  
18 inclusion criteria of: residing in Canada, having the ability to read and write in English and/or  
19 French, and having a confirmed pregnancy <35 weeks gestation [35]. Participant consent was  
20 collected through Research Electronic Data Capture (REDCap) where participants signed the  
21 electronic consent to answer questionnaires and open-ended response questions. This study was  
22 approved by the University of Calgary Conjoint Health Research Ethics Board (REB20-0500).  
23

24 For the purpose of this study, data include only participants who self-identified as  
25 Indigenous (First Nations, Métis, Inuit) or mixed Indigenous descent. Out of the larger sample ( $N$   
26 = 10,669), 336 individuals self-identified as Indigenous; 45.2% self-identified as Métis, 42.6%  
27 self-identified as First Nations, 11.3% self-identified as mixed Indigenous ancestry, and 0.9%  
28 self-identified as Inuit. Participants were located in Quebec (25.3%), Ontario (18.8%), Alberta  
29 (18.2%), British Columbia (13.7%), Manitoba (11.0%), Saskatchewan (6.8%), Nova Scotia  
30 (3.3%), Northwest Territories (1.2%), Yukon (1.2%), and Newfoundland and Labrador (0.6%).  
31 On average, participants were  $30.33 \pm 5.0$  years old. Most participants were married or living  
32 with a common law partner (86.9%), had completed community college, an equivalent trade or  
33 vocational degree, or greater (77.7%), and had an annual household income greater than \$70,000  
34 CAD (57.8%).  
35  
36  
37  
38

### 39 **Patient and Public Involvement**

40 The public was not involved in the design, reporting and dissemination of our study.  
41

### 42 **Measures**

#### 43 *Depression*

44 To measure symptoms of depression, the Edinburgh Postnatal Depression Scale (EPDS) was  
45 used [53]. The EPDS is a 10-item self-report scale, with scores ranging from 0-30, and is  
46 commonly used to assess depression levels amongst pregnant and postnatal individuals [53].  
47 Higher self-report scores indicate increased depressive symptoms, and a cut-off of  $\geq 13$  is used to  
48 indicate clinically elevated symptoms of depression [53].  
49  
50

#### 51 *Anxiety*

52 To measure symptoms of anxiety, the Patient-Reported Outcomes Measurement  
53 Information System (PROMIS) Anxiety Adult 7-item short form was used. This self-report  
54 measure has possible t-scores ranging from 36.7 to 82.7, with higher scores indicating greater  
55  
56  
57  
58  
59  
60

1  
2  
3 levels of anxiety. A cut-off of  $\geq 60$  is used to indicate clinically elevated symptoms of anxiety  
4 [54].  
5

### 6 *Prenatal care and birth plans*

7  
8 Participants were asked questions about experiencing changes in prenatal care, prenatal  
9 appointment cancellations, changes to birth plans (e.g., changes to birth location, inclusion of  
10 support persons, childcare arrangements, or other). Home births were not differentiated within  
11 changes to birth plans. The ability to bring a partner or support person to appointments was also  
12 considered. Participants were also asked to indicate which health services were difficult to access  
13 due to the pandemic (e.g., massage, chiropractic, physiotherapy, acupuncture, psychological  
14 counselling, or other). Finally, participants were asked if they felt that the quality of care had  
15 decreased and if they were concerned about self and baby not receiving necessary care.  
16 Responses on these last two items were measured on a scale from 0 – 100, with anchors being 0  
17 = *not at all*, 50 = *somewhat*, and 100 = *very much so*.  
18  
19

### 20 *Social support*

21  
22 To assess perceived social support, participants completed two questionnaires: The Social  
23 Support Effectiveness Questionnaires (SSEQ; [55]) and the Interpersonal Support Evaluation  
24 List (ISEL; [55]). The SSEQ is a 25-item questionnaire that evaluates the perceived effectiveness  
25 of support received from another person, which for this study was the pregnant individual's  
26 partner. Psychometric evaluation reveals reliability of the SSEQ with alpha ( $\alpha = .87$ ; [55]).  
27

28 The ISEL is a 12-item questionnaire that evaluates general support received from a broader  
29 network, including friends and family [56]. Reliability for the ISEL has been demonstrated in a  
30 cohort of mothers from a general population, with alpha ( $\alpha = .86$ ; [57]).

31 Additionally, participants reported whether they regularly attended a religious, cultural, or  
32 social group that could not meet during the COVID-19 pandemic.  
33

### 34 *Coping*

35  
36 To explore how individuals were coping with the uncertainty and stress of being pregnant  
37 during the COVID-19 pandemic, participants were asked an open-ended question, "*People are*  
38 *responding to the pandemic in many ways. Can you tell us what things you are doing to cope*  
39 *with the COVID-19 pandemic?*"  
40

## 41 **Data Analysis**

### 42 *Statistical Analysis*

43  
44 IBM SPSS Statistics 28 was used for all statistical analysis. Survey responses were  
45 checked for incomplete or invalid responses, which were removed prior to analyses. Outliers in  
46 the data were also examined and winsorized if  $>3SD$  from the mean of the corresponding  
47 measure. This resulted in the winsorization of two PROMIS Anxiety t-score data points and one  
48 ISEL data point. Descriptive statistics ( $n = 336$ ) were computed for demographic information,  
49 including geographical location, age, marital status, household income, and education.  
50 Additionally, descriptive statistics ( $n = 336$ ) were computed for mental wellbeing, social support,  
51 and disruptions to prenatal care.  
52

53  
54 Hierarchical linear regression analyses ( $n = 260$ ) were used to examine the impact of  
55 various predictors on anxiety (Model 1) and depression (Model 2) for pregnant Indigenous  
56 persons. Block 1 included demographic characteristics, such as age, household income,  
57  
58  
59

education, marital status, savings, gestation, and parity. Block 2 included social support characteristics, such as levels of general social support, partner social support, and social group attendance. Finally, Block 3 included COVID-19 related disruptions to prenatal care, such as changes in care, prenatal appointment cancellations, decrease in quality care, concern about self and baby not receiving necessary care, changes to birthing plans, trouble accessing healthcare, and ability to bring partner or support person to appointments. Approximately 23% of participants ( $n = 76$ ) were missing data for one or more of the predictor variables, and these cases were handled through listwise deletion for this portion of the analyses.

### *Qualitative Analysis*

The open-ended response question asking participants to report on the ways they were coping was analyzed qualitatively using a thematic approach. The responses to this question were exported from SPSS to NVivo where they were analyzed and coded thematically for identified themes [58]. As a first phase step, potential codes were documented based on topics from raw data. Analysis began with a deductive assessment of identifying data to fit within the codes. Subsequently, further coding was conducted inductively through the creation of codes based on emerging themes within the data [59]. Themes were exported from SPSS to a password protected file where they were summarized. Due to language constraints resulting from the collection of qualitative responses in both French and English, and time constraints, one coder conducted these analyses for the qualitative data. This coder identifies as an Indigenous woman who has particular interest and experience in studies related to Indigenous family wellness.

## **Results**

Participants in this study experienced a broad range of service disruptions due to the COVID-19 pandemic. Majority of participants (76.8%) experienced changes in prenatal care, including appointment cancellations (59.5%), with close to one-third of participants (32.1%) having made changes to their birthing plan. Specific changes included changes to birth location (11.3%), childcare arrangements (8.3%), and other unspecified changes (2.7%). Additionally, participants also reported changes to support people (25.6%), specifically, not being able to bring a support person to prenatal care appointments (84.5%). Just over half (54.8%) reported difficulties in accessing health care services such as massage (43.8%), chiropractic care (21.4%), psychological counselling (15.8%), physiotherapy (10.7%), other unspecified services (9.2%), and acupuncture (8.6%). A quarter (25%) of participants reported that religious, cultural, or social groups that they regularly attended could not meet during the pandemic. Participants also experienced high levels of psychological distress, with 40% meeting clinical cut-offs for comorbid depression and anxiety, 14% meeting cut-offs for only anxiety, and 5% meeting cut-offs for only depression. Additional sample characteristics for psychological distress, protective factors, and COVID-19 related prenatal care disruptions are noted in **Table 1**.

**Table 1**

*Sample Characteristics for Psychological Distress, Protective Factors, and COVID-19 Related Prenatal Care Disruptions*

| Measure | Mean | SD | Range |
|---------|------|----|-------|
|---------|------|----|-------|

### Psychological Distress

|                                             |       |      |             |
|---------------------------------------------|-------|------|-------------|
| Edinburgh postnatal depression scale (EPDS) | 12.77 | 5.26 | 0 – 29      |
| PROMIS anxiety t-scores*                    | 61.15 | 8.07 | 42.1 – 82.7 |

### Protective Factors

|                         |                         |       |         |
|-------------------------|-------------------------|-------|---------|
| General social support* | 37.42                   | 7.33  | 14 – 48 |
| Partner social support  | 51.21                   | 16.92 | 4 – 80  |
| Social group attendance | 83 yes / 220 no / 7 n/a |       |         |

### COVID-19-related Service Disruption

|                                                            |                  |       |         |
|------------------------------------------------------------|------------------|-------|---------|
| Changes in prenatal care                                   | 258 yes / 45 no  |       |         |
| Prenatal appointment cancellations                         | 103 yes / 200 no |       |         |
| Decrease in quality care                                   | 45.69            | 33.07 | 0 – 100 |
| Concern about self and baby not receiving necessary care   | 35.64            | 31.50 | 0 – 100 |
| Changes in birth plan                                      | 108 yes / 194 no |       |         |
| Trouble accessing healthcare                               | 184 yes / 118 no |       |         |
| Ability to bring partner or support person to appointments | 47 yes / 256 no  |       |         |

\* Winsorized

### Depression

Analysis of the first hierarchical linear regression model revealed that all three blocks significantly predicted levels of prenatal depression symptoms among pregnant Indigenous persons. The first block included the demographic variables of age, household income, education, marital status, household savings, gestational age, and parity. This first block accounted for 14.4% of the variance,  $F(7,252) = 6.047$ ,  $p < .001$ ,  $f^2 = 0.17$ . Increased levels of household income ( $p = .004$ ) and savings ( $p = .006$ ) significantly predicted decreased depression symptoms. Additionally, being married, living in a common-law relationship, or living with a partner was also a significant predictor of decreased depression symptoms ( $p = .036$ ).

When added in the second block, general social support, partner social support, and social group attendance significantly accounted for an additional 15.9% of the variance in depression symptoms,  $F(3,249) = 18.881$ ,  $p < .001$ ,  $f^2 = 0.23$ . Overall, the second block accounted for 30.2% of the variance in depression symptoms,  $F(10,249) = 10.798$ ,  $p < .001$ ,  $f^2 = 0.43$ . Higher levels of savings continued to significantly predict decreased depression symptoms ( $p = .021$ ).

With respect to social support variables, increased general social support ( $p = .006$ ) and partner social support ( $p < .001$ ) were significantly predictive of decreased depression symptoms.

The third block added COVID-19-related prenatal care disruptions into the model, which accounted for an increased 6.9% of the variance,  $F(7,242) = 3.809$ ,  $p < .001$ ,  $f^2 = 0.11$ . This block accounted for 37.2% of the variance in depression symptoms,  $F(17,242) = 8.422$ ,  $p < .001$ ,  $f^2 = 0.59$ . Increased general social support ( $p = .009$ ) and partner social support ( $p < .001$ ) continued to significantly predict decreased depression symptoms. Of prenatal care disruption variables, experiencing increased concerns about self and baby not receiving necessary care ( $p = .022$ ) and having trouble in accessing healthcare ( $p = .017$ ) significantly predicted increased depression symptoms. See **Table 2** for results of the whole model.

**Table 2**  
*Hierarchical Multiple Regression Analysis Predicting Depression Symptoms*

| Predictors | $\beta$                | SE    | t    | p      | Adjusted $R^2$ |
|------------|------------------------|-------|------|--------|----------------|
| Block 1    | Constant               |       |      | <.001* | .120           |
|            | Age                    | -.026 | .08  | -.37   | .713           |
|            | Household income       | -.218 | .21  | -2.90  | .004*          |
|            | Education              | .018  | .35  | .26    | .799           |
|            | Marital status         | -.131 | 1.14 | -2.11  | .036*          |
|            | Savings                | -.173 | .29  | -2.75  | .006*          |
|            | Gestation              | -.015 | .04  | -.25   | .805           |
|            | Parity                 | .047  | .49  | .72    | .470           |
| Block 2    | Constant               |       |      | <.001* | .274           |
|            | Age                    | -.093 | .08  | -1.41  | .161           |
|            | Household income       | -.105 | .20  | -1.50  | .135           |
|            | Education              | .013  | .33  | .19    | .849           |
|            | Marital status         | -.087 | 1.06 | -1.53  | .127           |
|            | Savings                | -.134 | .27  | -2.32  | .021*          |
|            | Gestation              | -.006 | .04  | -.12   | .907           |
|            | Parity                 | -.033 | .46  | -.54   | .587           |
|            | General social support | -.173 | .02  | -2.75  | .006*          |
|            | Partner social support | -.312 | .05  | -4.65  | <.001*         |

|         |                                                            |       |      |       |        |      |
|---------|------------------------------------------------------------|-------|------|-------|--------|------|
|         | Social group attendance                                    | .073  | .73  | 1.28  | .200   |      |
| Block 3 | Constant                                                   |       |      |       | <.001* | .328 |
|         | Age                                                        | -.079 | .08  | -1.22 | .225   |      |
|         | Household income                                           | -.133 | .20  | -1.92 | .056   |      |
|         | Education                                                  | -.013 | .32  | -.20  | .839   |      |
|         | Marital status                                             | -.101 | 1.02 | -1.82 | .070   |      |
|         | Savings                                                    | -.105 | .26  | -1.87 | .063   |      |
|         | Gestation                                                  | -.051 | .04  | -.95  | .345   |      |
|         | Parity                                                     | -.012 | .45  | -.21  | .834   |      |
|         | General social support                                     | -.161 | .02  | -2.62 | .009*  |      |
|         | Partner social support                                     | -.243 | .05  | -3.65 | <.001* |      |
|         | Social group attendance                                    | .020  | .73  | .35   | .727   |      |
|         | Changes in prenatal care                                   | .003  | 1.17 | .05   | .962   |      |
|         | Prenatal appointment cancellations                         | -.037 | .75  | -.60  | .552   |      |
|         | Decrease in quality care                                   | -.030 | .02  | -.32  | .751   |      |
|         | Concern about self and baby not receiving necessary care   | .207  | .02  | 2.31  | .022*  |      |
|         | Changes in birth plan                                      | .097  | .69  | 1.70  | .090   |      |
|         | Trouble accessing healthcare                               | .136  | .68  | 2.41  | .017*  |      |
|         | Ability to bring partner or support person to appointments | -.030 | .88  | -.53  | .596   |      |

\*  $p < .05$

### Anxiety

Similar to the first model, analysis of the second hierarchical linear regression model revealed that all three blocks significantly predicted levels of prenatal anxiety symptoms. The first block demonstrated that demographics accounted for 8.0% of the explained variance in anxiety symptoms,  $F(7,252) = 3.110$ ,  $p = .004$ ,  $f^2 = 0.09$ . Increased levels of household income

( $p = .038$ ) and savings ( $p = .007$ ) were significantly predictive of decreased anxiety symptoms. Meanwhile, education, marital status, gestation, and parity did not significantly predict anxiety symptoms.

In the second block, addition of general social support, partner social support, and social group attendance increased the explained variance in anxiety symptoms by 10.9%,  $F(3,249) = 11.201$ ,  $p < .001$ ,  $f^2 = 0.13$ . As a whole, the second block accounted for 18.9% of the variance in anxiety symptoms,  $F(10,249) = 5.801$ ,  $p < .001$ ,  $f^2 = 0.23$ . Increased levels of savings ( $p = .019$ ) continued to be predictive of decreased anxiety symptoms. With respect to social support variables, increased partner social support predicted lower anxiety symptoms ( $p < .001$ ), while social group attendance and general social support were not significant predictors ( $p > .05$ ).

The addition of COVID-19-related prenatal care service disruptions in the third block increased the explained variance in anxiety symptoms by 10.1%,  $F(7,242) = 4.908$ ,  $p < .001$ ,  $f^2 = 0.14$ . This final block was responsible for predicting 29.0% of the variance in anxiety symptoms,  $F(17,242) = 5.808$ ,  $p < .001$ ,  $f^2 = 0.41$ . Of the demographic and social support variables, only increased partner social support continued to significantly predict decreased anxiety symptoms ( $p = .002$ ). Regarding service care disruptions, experiencing changes in birth plans ( $p = .026$ ) and having trouble accessing healthcare ( $p = .038$ ), significantly predicted increased anxiety symptoms. Further, experiencing increased concerns about self and baby not receiving necessary care also significantly predicted increased anxiety symptoms ( $p < .001$ ). See **Table 3** for results of the whole model.

**Table 3**  
*Hierarchical Multiple Regression Analysis Predicting Anxiety Symptoms*

| Predictors       | $\beta$ | SE   | t     | p     | Adjusted $R^2$ |
|------------------|---------|------|-------|-------|----------------|
| Block 1          |         |      |       | .004* | .054           |
| Age              | -.032   | .12  | -.44  | .663  |                |
| Household income | -.162   | .31  | -2.08 | .038* |                |
| Education        | .096    | .51  | 1.31  | .192  |                |
| Marital status   | -.065   | 1.67 | -1.01 | .315  |                |
| Savings          | -.176   | .43  | -2.70 | .007* |                |
| Gestation        | -.003   | .06  | -.04  | .965  |                |
| Parity           | .055    | .72  | .81   | .418  |                |
| Block 2          |         |      |       | <.001 | .156           |
| Age              | -.095   | .12  | -1.34 | .181  |                |
| Household income | -.069   | .30  | -.91  | .364  |                |
| Education        | .094    | .50  | 1.29  | .197  |                |

|    |         |                                                          |       |      |       |        |
|----|---------|----------------------------------------------------------|-------|------|-------|--------|
| 1  |         |                                                          |       |      |       |        |
| 2  |         |                                                          |       |      |       |        |
| 3  |         |                                                          |       |      |       |        |
| 4  |         | Marital status                                           | -.021 | 1.60 | -.35  | .729   |
| 5  |         | Savings                                                  | -.146 | .41  | -2.36 | .019*  |
| 6  |         | Gestation                                                | .004  | .05  | .07   | .941   |
| 7  |         | Parity                                                   | -.007 | .70  | -.11  | .914   |
| 8  |         | General social support                                   | -.086 | .03  | -1.27 | .205   |
| 9  |         | Partner social support                                   | -.299 | .08  | -4.12 | <.001* |
| 10 |         | Social group attendance                                  | .086  | 1.11 | 1.40  | .162   |
| 11 | Block 3 |                                                          |       |      |       | <.001* |
| 12 |         |                                                          |       |      |       | .240   |
| 13 |         | Age                                                      | -.083 | .12  | -1.20 | .231   |
| 14 |         | Household income                                         | -.090 | .30  | -1.22 | .223   |
| 15 |         | Education                                                | .064  | .48  | .91   | .364   |
| 16 |         | Marital status                                           | -.034 | 1.53 | -.59  | .559   |
| 17 |         | Savings                                                  | -.113 | .39  | -1.89 | .061   |
| 18 |         | Gestation                                                | -.046 | .05  | -.80  | .423   |
| 19 |         | Parity                                                   | .023  | .68  | .36   | .718   |
| 20 |         | General social support                                   | -.079 | .03  | -1.21 | .227   |
| 21 |         | Partner social support                                   | -.216 | .08  | -3.06 | .002*  |
| 22 |         | Social group attendance                                  | .019  | 1.09 | .32   | .749   |
| 23 |         | Changes in prenatal care                                 | .020  | 1.75 | .28   | .780   |
| 24 |         | Prenatal appointment cancellations                       | -.072 | 1.12 | -1.10 | .273   |
| 25 |         | Decrease in quality care                                 | -.091 | .03  | -.90  | .371   |
| 26 |         | Concern about self and baby not receiving necessary care | .319  | .03  | 3.36  | <.001* |
| 27 |         | Changes in birth plan                                    | .135  | 1.04 | 2.24  | .026*  |
| 28 |         |                                                          |       |      |       |        |
| 29 |         |                                                          |       |      |       |        |
| 30 |         |                                                          |       |      |       |        |
| 31 |         |                                                          |       |      |       |        |
| 32 |         |                                                          |       |      |       |        |
| 33 |         |                                                          |       |      |       |        |
| 34 |         |                                                          |       |      |       |        |
| 35 |         |                                                          |       |      |       |        |
| 36 |         |                                                          |       |      |       |        |
| 37 |         |                                                          |       |      |       |        |
| 38 |         |                                                          |       |      |       |        |
| 39 |         |                                                          |       |      |       |        |
| 40 |         |                                                          |       |      |       |        |
| 41 |         |                                                          |       |      |       |        |
| 42 |         |                                                          |       |      |       |        |
| 43 |         |                                                          |       |      |       |        |
| 44 |         |                                                          |       |      |       |        |
| 45 |         |                                                          |       |      |       |        |
| 46 |         |                                                          |       |      |       |        |
| 47 |         |                                                          |       |      |       |        |
| 48 |         |                                                          |       |      |       |        |
| 49 |         |                                                          |       |      |       |        |
| 50 |         |                                                          |       |      |       |        |
| 51 |         |                                                          |       |      |       |        |
| 52 |         |                                                          |       |      |       |        |
| 53 |         |                                                          |       |      |       |        |
| 54 |         |                                                          |       |      |       |        |
| 55 |         |                                                          |       |      |       |        |
| 56 |         |                                                          |       |      |       |        |
| 57 |         |                                                          |       |      |       |        |
| 58 |         |                                                          |       |      |       |        |
| 59 |         |                                                          |       |      |       |        |
| 60 |         |                                                          |       |      |       |        |



|                                                                  |      |      |      |       |
|------------------------------------------------------------------|------|------|------|-------|
| Trouble accessing<br>healthcare                                  | .125 | 1.02 | 2.09 | .038* |
| Ability to bring partner or<br>support person to<br>appointments | .003 | 1.31 | .05  | .964  |

\*  $p < .05$

### Coping

Approximately half of participants ( $n = 167$ ) responded to the open-ended question about coping, with the majority of responses (67.5%) being between 1 to 20 words in length. Eight themes emerged: *staying informed, physical and/or outdoor activities, passive or independent home-based activities, creative activities, social and/or cultural activities, avoidant approaches, internal mental health strategies, and struggling to cope*. Subcodes (see **Figure 1**) were developed within each theme. Results from open-ended response questions are summarized in **Table 4**.

**Table 4.**  
*Coping Strategies – Qualitative Themes*

| Theme                                            | Sub-Theme(s)                                                                                             | Overview                                                                                                                                                                                                                                                                                                                                                                                                                        | Quotes                                                                                                                                                                                                                                                                                                                                                                                                 |
|--------------------------------------------------|----------------------------------------------------------------------------------------------------------|---------------------------------------------------------------------------------------------------------------------------------------------------------------------------------------------------------------------------------------------------------------------------------------------------------------------------------------------------------------------------------------------------------------------------------|--------------------------------------------------------------------------------------------------------------------------------------------------------------------------------------------------------------------------------------------------------------------------------------------------------------------------------------------------------------------------------------------------------|
| Staying Informed                                 | Adherence to public health guidelines                                                                    | This theme is characterized by caution and care related to public health advisory in response to the pandemic. Staying home, handwashing, wearing a mask, social distancing and adapting daily activities such as work, shopping, and school to virtual mediums were expressed by some participants as eliciting peace of mind.                                                                                                 | <p><i>“Using PPE, being extra cautious.”</i></p> <p><i>“Following health authorities’ guidelines.”</i></p> <p><i>“Staying home. No friends over for the kids or any visiting friends.”</i></p>                                                                                                                                                                                                         |
| Physical and/or Outdoor Activity                 | Being outdoors/in nature<br>Walking<br>Exercising                                                        | Participants shared that spending time outdoors, in nature, and being physically active are practices that support coping through pregnancy during the pandemic. Most commonly, walking and gardening were referenced in this sample.                                                                                                                                                                                           | <p><i>“I find dealing with your head easier when you can put it all into a project with long term benefits. Food and living life are always solid go-to’s for mental health, try to live in the present.”</i></p> <p><i>“I have always been very active outside wilderness trips, kayaking hikes... so I’ve turned to gardening, making my yard beautiful getting a few chickens to focus on.”</i></p> |
| Passive and/or Home-Based Independent Activities | Comfort and self-care<br>Relaxing and independent activities<br>Keeping busy and taking care of the home | Activities ranging from reading, increasing hours of rest, tackling yard work, and home cleaning, were found to be comforting by many participants. While this theme is characterized by independent activities that can be enjoyed in the home, we differentiate between those who preferred more passive activities such as bathing and napping, and those who preferred more energetic activities, such as household chores. | <p><i>“Keeping my mind occupied with television, reading or sleeping during the day.”</i></p> <p><i>“Keeping the house tidy and clean which has been very satisfying.”</i></p>                                                                                                                                                                                                                         |
| Creative Activities                              | Preparing for new baby<br>Cooking/baking<br>Crafting                                                     | Creative activities were shared by some participants as being beneficial additions to their coping strategies. These included making arrangements for a new baby, cooking, baking, and crafting.                                                                                                                                                                                                                                | <p><i>“I am finding ways to make myself more excited about the baby having a friend do weekly bump photos outside my home and making a pregnancy book.”</i></p> <p><i>“Cooking nice food and getting excited about meals.”</i></p>                                                                                                                                                                     |

1  
2  
3  
4  
5  
6  
7  
8  
9  
10  
11  
12  
13  
14  
15  
16  
17  
18  
19  
20  
21  
22  
23  
24  
25  
26  
27  
28  
29  
30  
31  
32  
33  
34  
35  
36  
37  
38  
39  
40  
41  
42  
43  
44  
45  
46  
47

|                                   |                                                                                                                                |                                                                                                                                                                                                                                                                                                                                                                                                                                                                                                                                                                                                                                       |                                                                                                                                                                                                                                                                                                                                                                                                                                                                                               |
|-----------------------------------|--------------------------------------------------------------------------------------------------------------------------------|---------------------------------------------------------------------------------------------------------------------------------------------------------------------------------------------------------------------------------------------------------------------------------------------------------------------------------------------------------------------------------------------------------------------------------------------------------------------------------------------------------------------------------------------------------------------------------------------------------------------------------------|-----------------------------------------------------------------------------------------------------------------------------------------------------------------------------------------------------------------------------------------------------------------------------------------------------------------------------------------------------------------------------------------------------------------------------------------------------------------------------------------------|
| Social and/or Cultural Activities | Cultural practice and connection<br>Engaging with children<br>Safe in-person interactions<br>Virtual social connection<br>Pets | Socializing was a key theme among participants for maintaining wellbeing through the pandemic and navigating isolation during pregnancy. Cultural values were also referenced by some. Of particular note were the challenges communities faced engaging in community connection and cultural practices due to additional barriers brought forth by the pandemic. Participants found that interacting at home with their children, pets, and partners was helpful in mitigating stress. Staying connected to extended family and friends in person when it was safe to do so, or virtually when necessary, was also noted as helpful. | <i>“I am taking this extra time to really learn new ways to grow and have been reaching out for support more and talking more about my struggles with family and peers. Using snapchat had helped me keep in contact with my friends and loved ones.”</i><br><i>“Trying to connect with the Indigenous community online.”</i><br><i>“Moved into my parent’s house to have more help with the toddler and more socialization for all of us.”</i>                                               |
| Avoidant Approaches               | Limiting news<br>Maintaining normalcy<br>Working<br>Routine and structure                                                      | In contrast to those who found solace in staying informed on matters related to the pandemic, others found it more helpful to avoid news consumption and attempt to remain grounded in normalcy and routine. For example, by continuing to work and be consistent in the structure of their pre-pandemic lives, as well as those of their children, participants felt it easier to cope with circumstances of the broader environment.                                                                                                                                                                                                | <i>“Only watch a little news in the morning but otherwise tuning it out.”</i><br><i>“Keeping to my normal pre-pandemic routine as much as possible.”</i>                                                                                                                                                                                                                                                                                                                                      |
| Internal Mental Health Strategies | Optimism and mindfulness<br>Gratitude<br>Therapy                                                                               | Perception-based strategies were employed by some participants in order to combat stressors arising as a result of the pandemic. These included being optimistic and mindful, finding opportunities to reflect and experience gratitude, taking life one day and a time, and attending mental health therapy sessions.                                                                                                                                                                                                                                                                                                                | <i>“I lost my mom and brother the year before the pandemic. So, comparatively, perspective has been important. I had already turned ‘inward’ and slowed my life to accommodate my grief journey. Pandemic felt like an extension of this.”</i><br><i>“I’ve also been able to find joy in many things, and am extremely grateful to be in such a position to be able to work, help, feel financially stable, and re-connect with my family during what is globally such an uncertain time”</i> |
| Struggling to Cope                | Not Coping                                                                                                                     | Some participants stated that they are not coping well, if at all. Expressions of frustration with public health regulations were also shared.                                                                                                                                                                                                                                                                                                                                                                                                                                                                                        | <i>“I am not coping well.”</i><br><i>“I’m not [coping].”</i><br><i>“Beyond the things above grocery shopping, it really stresses me out. I hate all the stupid rules...”</i>                                                                                                                                                                                                                                                                                                                  |

## Discussion

During the COVID-19 pandemic, over half (>50%) of Indigenous pregnant individuals in our sample experienced clinically significant levels of prenatal depression and/or anxiety. Heightened levels of both depression and anxiety may have been impacted by uncertainty around the impacts of COVID-19, and time during which the data was collected, as health restrictions were high. Our results are consistent with other studies reporting increased depression and anxiety among pregnant individuals [31,2], along with increased mental wellbeing concerns amongst Indigenous populations [11,26]. Participants reported increased service disruptions due to the COVID-19 pandemic, including restricted access to quality care and decreased quality of prenatal care, changes to birthing plans, and decreased opportunities for social support during birthing.

Healthcare service use among pregnant individuals is dependent upon several elements related to sociodemographic factors, economics, and facility logistics, including distance to and quality of health care [60]. The COVID-19 pandemic presented with unique challenges that further limited healthcare service use among pregnant individuals due to issues such as decreased access to prenatal services and concerns about contracting COVID-19 [61]. For Indigenous communities, systemic racial discrimination and inequalities in health care accessibility create further barriers in accessing quality prenatal care [11,12,26]. Previous research suggests that there are strong associations between limited access to prenatal care and psychological distress among pregnant individuals, and our results mirror these findings when examining the Indigenous pregnant population in Canada [2].

The importance of accessible quality prenatal care for both the pregnant individual and unborn baby cannot be overstated in discussions to support the psychological wellbeing of Indigenous pregnant individuals. Experiencing difficulties in access to prenatal care and having greater concerns about quality of care was significantly predictive of both prenatal depression and anxiety symptoms. Additionally, experiencing changes in birthing plans was significantly predictive of prenatal anxiety. Pregnancy care service quality and accessibility issues along with changes in birth plan are linked to depressive and anxiety-based symptoms across multiple studies [62,63,64,65]. Discomfort with novel healthcare processes, such as virtual or telehealth appointments, and overlapping stress from experiencing a pregnancy during a global health pandemic may have further impacted self-reported levels of depression and anxiety. As pregnancies can be a time of heightened stress levels, uncertainties about accessing and quality of prenatal care are likely to impact mental wellbeing [66,67,68].

These findings are aligned with others that have emerged in the literature regarding pregnancy during the pandemic with anxiety, depression, and healthcare challenges noted consistently [69,24,70,71]. Theoretical foundations to support these findings can be seen in Maslow's classic conceptualization of the Hierarchy of Needs [72] where it is said that certain needs must be addressed prior to others. Specifically, physiological needs are posited to be of primary importance and said to be critical to address first, in order to then consider other needs. In this study, participants' disclosures of distress related to issues with basic healthcare reflects the imperative nature of caring for such fundamental needs. In addition to health inequities, Indigenous peoples also face socioeconomic disparities [73] which create further barriers in

1  
2  
3 accessing health care and is consistent with policies to reduce poverty related stress [74]. The  
4 impacts of colonization and generational wealth policies systematically create barriers for the  
5 wellness of pregnant Indigenous individuals. Due to the recruitment methodology of the larger  
6 *Pregnancy During the COVID-19 Pandemic* study, the sample generally skews towards higher  
7 socioeconomic status, thus, we may expect the importance of financial security to be more  
8 relevant in a more representative sample.  
9

10  
11 In addition to prenatal care, findings of this study also suggest the notable influence of social  
12 support on the wellbeing of pregnant Indigenous persons. Increased partner social support was  
13 predictive of decreased levels of depression and anxiety, while increased general social support  
14 was predictive of decreased levels of depression only. Similar findings were reported in the  
15 larger *Pregnancy during the Pandemic* sample by Lebel and colleagues (2020), which found that  
16 both partner and general social support predicted reduced levels of anxiety and depression in  
17 pregnant individuals. These findings mirror previous literature in the field, which demonstrates  
18 significant associations between social support and mental wellbeing concerns among pregnant  
19 individuals broadly [75,76,77], and among Indigenous pregnant individuals [34]. The emergence  
20 of partner social support as the most significant predictor for prenatal anxiety and depression in  
21 comparison to other levels of social support (i.e., general social support and social group  
22 attendance) is expected. At the height of the COVID-19 pandemic, numerous public health  
23 measures, such as mandatory lockdowns and social distancing, were introduced to limit  
24 transmission of the virus. For many individuals, these changes inadvertently affected access to  
25 social support systems outside the home, thereby increasing reliance on such systems within the  
26 home [78]. The COVID-19 Family Disruption Model [78] highlights the importance of these  
27 relationships and social support systems in maintaining wellbeing during periods of heightened  
28 stress. For pregnant individuals, the significant association between prenatal mental wellbeing  
29 and partner social support during the COVID-19 pandemic [79,80,24] presents partner support as  
30 a modifiable protective factor to enhance prenatal wellbeing.  
31  
32  
33  
34

35 In alignment with our objective to understand coping strategies, qualitative results reveal  
36 various approaches to coping with stressors as arisen through experiencing a pregnancy during a  
37 global health pandemic. These include strategies such as staying informed on the progression of  
38 the pandemic and public health guidelines, engaging in physical and/or outdoor activity,  
39 engaging in home-based and/or other independent activities, engaging in creative activities,  
40 engaging in social and cultural activities with family, developing mental wellbeing strategies and  
41 routines, (e.g., meditation, practicing gratitude, therapy) and attempting to avoid the pandemic  
42 reality (e.g., limiting news consumption). This is consistent with extant literature on coping  
43 mechanisms related to avoidance-based activities, connection driven activities, and alignment  
44 with recommendations for safety from public health governing bodies [43,44,45]. Some  
45 participants expressed struggles to cope or a perceived lack of coping entirely. Struggling to cope  
46 has been a consistent experience across pregnant individuals during the pandemic with shifting  
47 availability of pre-pandemic coping strategies and a substantial deviation from normalcy [81].  
48  
49  
50

51 In Canada specifically, pregnant individuals during the pandemic were found to have  
52 increased rates of depression and anxiety as amplified by financial strain, social isolation, risk of  
53 contracting the COVID-19 infection, and relationship difficulties, which were buffered by social  
54 support [82,36]. With Indigenous persons in Canada, we expect to see increased levels of distress  
55  
56  
57  
58  
59  
60

1  
2  
3 due to disproportionate negative mental wellbeing experiences observed within that demographic  
4 [83,46,47]. This is exacerbated through neglectful and harmful interactions with healthcare  
5 systems [84]. It is important to acknowledge the resilience developed among Indigenous parents  
6 who continue to engage in support service-oriented research despite negative past and ongoing  
7 experiences throughout their pursuit of care in the perinatal period. Respondents in this study  
8 reported strengths with social and partner support and the use of various coping strategies which  
9 appear to add to resilience factors.  
10  
11

12 According to Lazarus and Folkman Transactional Theory of Stress and Coping (TTSC) [85]  
13 individuals interact with stress in a transactional exchange with their environment. Coping that  
14 ensues is said to be categorized based on problem focused and emotion focused strategies.  
15 Active coping aimed at addressing a given stressor is characteristic of a problem focused  
16 approach, whereas passive and avoidance-based coping is often representative of emotion  
17 focused strategies. Given that addressing the 'problem' at the root of the stressor in this  
18 circumstance, namely the COVID-19 virus, was largely outside of participants' control, active  
19 coping was seen in this sample through adherence to public health guidelines and taking steps to  
20 engage in health promoting activities such as being physically active and spending time  
21 outdoors. Additionally, avoidance-oriented coping was also noted in this sample, such as limited  
22 new consumption. Therefore, in keeping with the TTSC, both problem and emotion focused  
23 coping strategies are exemplified in our findings.  
24  
25  
26

27 The Breath of Life Theory, coined by Blackstock [86], has been proposed as a critical  
28 framework for understanding relational elements of wellbeing and culturally centred  
29 understanding of needs for Indigenous, specifically First Nations, people. Our findings related to  
30 coping and social support provide evidence to support this in the present study, as these factors  
31 revealed connection to spiritual and cultural practice as well as social connection were vital  
32 supports in the face challenges imposed by the pandemic provide evidence to support this in the  
33 present study.  
34  
35  
36

### 37 **Limitations**

38 A limitation of this study is the lack of inclusion of telehealth service use. As the participant  
39 sample consisted of Indigenous populations, the issue of limited access to reliable Wi-Fi and  
40 technology within some Indigenous communities should be noted as potentially impacting  
41 service use and disruption. Recruitment relying primarily on social media potentially reduced the  
42 number of participants that may have otherwise been recruited with a broader reach through  
43 other means. This may have also inflated the socioeconomic status of the sample due to the need  
44 for participants to have access to technology and social media. Therefore, our sample  
45 demographics reported household income as greater than the median for Canadian families in  
46 2019 [87], which does not accurately reflect median incomes for Indigenous populations [88].  
47  
48

49 There was no assessment of the tole of traditional birthing and health practices, such as  
50 midwives, in the original study. Access to traditional healing practices may have impacted  
51 differently than Western medical practices. Further, research practices have been historically  
52 harmful when conducted with Indigenous populations [89,90,74]. This has led to mistrust of  
53 research groups and practices among Indigenous peoples and, consequently, may have impeded  
54 the participation of some Indigenous pregnant persons in this study. Finally, due to the  
55 heterogeneity of Indigenous communities, these findings may not be generalizable across all  
56  
57  
58  
59  
60

1  
2  
3 Indigenous Nations and individuals, as values and beliefs held by one Nation or individual are  
4 not necessarily reflective of all. Accordingly, caution must be exercised in interpreting these  
5 results to not erroneously assume pan-Indigeneity of perspectives shared and conclusions drawn  
6 herein. Given the rapid-response survey development and broad reach of the original study,  
7 baseline stressors were not included as part of data collection. Additionally, anxiety and  
8 depression symptom scores were based on self-report scores and not clinical diagnoses.  
9  
10

### 11 **Implications and Future Directions**

12 These results carry important implications for the information of pregnant Indigenous  
13 persons through the illustration of challenges in accessibility of care and changes in prenatal care  
14 resulting from the pandemic. Healthcare providers may benefit from findings produced through  
15 this study to inform change aimed at adequately accommodating the healthcare related needs of  
16 Canadian Indigenous peoples experiencing a pregnancy. As part of the greater longitudinal  
17 objectives, future research will continue to track mental wellbeing of individuals who were  
18 pregnant during the pandemic and examine child wellbeing outcomes. Postpartum care will be  
19 studied to understand the extent to which services are improved or hindered as the pandemic  
20 progresses. Additionally, examining the racial and ethnicity concordance of service providers,  
21 along with access to traditional birthing services, should be examined for any potential  
22 influences on service access and use among the population in this study.  
23  
24  
25

26 Service disruptions and/or low qualitative prenatal care is a serious issue which exacerbates  
27 systemic inequities and contributes to poor mental wellbeing [13,26]. Aspects of service  
28 disruptions, such as access to traditional birthing methods and the use of telehealth services  
29 should be carefully considered. Social support, including partners and social groups, seems to be  
30 a protective factor for pregnant individuals. Enhancing the efficacy of policies and programming  
31 surrounding prenatal care, including the incorporation of a framework grounded in Indigenous  
32 perspectives [19], to increase accessibility and incorporate protective factors can increase quality  
33 of care. Further research in this area is warranted to understand the impact of COVID-19 on  
34 pregnant individuals, as exemplified by the following open-text response received from one of  
35 our participants:  
36  
37

38 *“I appreciate your researchers looking into this as for some time when the pandemic*  
39 *started, I felt invisible as a pregnant person as no one was paying attention to us so*  
40 *this makes me feel really good that as a group we are being considered. Thank you*  
41 *for your work.”*  
42  
43  
44  
45

### 46 **Contributorship statement**

47 GG, CL, LTM conceptualized the original study for which this study branches from. All authors  
48 were involved in conceptualization of this study. MM, SLP, JK, and JD were involved in  
49 drafting the manuscript, data analysis and interpretation. GG, CL, LTM, LR, and LW were  
50 involved in reviewing the manuscript. All authors gave final approval of the version to be  
51 published and agreement to be accountable for all aspects of the work.  
52  
53  
54  
55  
56  
57  
58  
59  
60

### Data availability statement

All data relevant to the study are included in the article or uploaded as online supplemental information

### Competing Interest Statement

The authors declare no competing interests.

### Ethics approval

This study involves human participants and was approved by the University of Calgary Conjoint Health Research Ethics Board (REB20-0500). Participants gave informed consent to participate in the study before taking part.

**Funding:** This research was funded in part, by a Social Sciences and Humanities Research Council (SSHRC) Insight Grant (Award/grant number N/A). Funding for author GG was provided by the Owerko Center, Alberta Children's Hospital Research Institute. Salary funding for authors CL and LTM was provided by the Canada Research Chairs (CRC) program (award/grant number N/A). Funding for author LR was provided by Research Manitoba, Canadian Institutes of Health Research (CIHR), SSHRC, and the Children's Hospital Research Institute of Manitoba (Award/ grant numbers N/A).

### References

- [1] Chen, X. K., Wen, S. W., Yang, Q., & Walker, M. C. (2007). Adequacy of prenatal care and neonatal mortality in infants born to mothers with and without antenatal high-risk conditions. *Aust NZ J Obst Gyn*, 47, 122–7. <https://doi.org/10.1111/j.1479-828X.2007.00697.x>
- [2] Groulx, T., Bagshawe, M., Giesbrecht, G., Tomfohr-Madsen, L., Hetherington, E., & Lebel, C. A. (2021). Prenatal care disruptions and associations with maternal mental health during the Covid-19 pandemic. *Frontiers in Global Women's Health*, 2. <https://doi.org/10.3389/fgwh.2021.648428>
- [3] Hohmann-Marriott, B. (2009). The couple context of pregnancy and its effects on prenatal care and birth outcomes. *Mat Child Health Journal*, 13, 745–54. <https://doi.org/10.1007/s10995-009-0467-0>
- [4] American Academy of Pediatrics and the American College of Obstetricians and Gynecologists. (2012). Preconception and antepartum care, intrapartum and postpartum care of the mother. Guidelines for Perinatal Care. 7th Edition. American Academy of Pediatrics and American College of Obstetricians and Gynecologists, 95-210. <https://doi.org/10.1542/9781581107715>
- [5] Buultjens, M., Gill, J., Fielding, J., Lambert, K. A., Vondeling, K., Mastwyk, S. E., Sloane, S., Fedele, W., Karimi, L., Milgrom, J., von Treuer, K., & Erbas, B. (2023). Maternity



- care during a pandemic: Can a hybrid telehealth model comprising group interdisciplinary education support maternal psychological health? *Women and Birth: Journal of the Australian College of Midwives*, 36(3), 305–313.  
<https://doi.org/10.1016/j.wombi.2022.09.007>
- [6] Evans, W. N., & Lien, D. S. (2005). The benefits of prenatal care: Evidence from the PAT bus strike. *Journal of Econometrics*, 125(1), 207–239.  
<https://doi.org/10.1016/j.jeconom.2004.04.007>
- [7] McDuffie, R. S., Jr, Beck, A., Bischoff, K., Cross, J., & Orleans, M. (1996). Effect of frequency of prenatal care visits on perinatal outcome among low-risk women: A randomized controlled trial. *JAMA*, 275(11), 847–851.  
<https://doi.org/10.1001/jama.1996.03530350029030>
- [8] Pant, S., Koirala, S., & Subedi, M. (2020). Access to maternal health services during COVID-19. *Europasian Journal of Medical Sciences*, 2(2), 46-50.  
<https://doi.org/10.46405/ejms.v2i2.110>
- [9] Sanders, J., & Blaylock, R. (2021). “Anxious and traumatised”: Users’ experiences of maternity care in the UK during the COVID-19 pandemic. *Midwifery*, 102, 103069.  
<https://doi.org/10.1016/j.midw.2021.103069>
- [10] Futterman ID, Grace H, Weingarten S, Borjian A, Clare CA. (2023). Maternal anxiety, depression and posttraumatic stress disorder (PTSD) after natural disasters: a systematic review. *J Matern Fetal Neonatal Med*.36(1):2199345. doi: 10.1080/14767058.2023.2199345. PMID: 37031972.
- [11] Kim, P. J. (2019). Social determinants of health inequities in Indigenous Canadians through a life course approach to colonialism and the Residential School System. *Health Equity*, 3(1), 378–381. <https://doi.org/10.1089/heq.2019.0041>
- [12] Richmond, C., & Cook, C. (2016). Creating conditions for Canadian Aboriginal health equity: The promise of healthy public policy. *Public Health Reviews*, 37.  
<https://doi.org/10.1186/s40985-016-0016-5>
- [13] Akter, S., Davies, K., Rich, J. L., & Inder, K. J. (2019). Indigenous women's access to maternal healthcare services in lower- and middle-income countries: a systematic integrative review. *International Journal of Public Health*, 64(3), 343-353.  
<https://doi.org/10.1007/s00038-018-1177-4>
- [14] Leason, J. L. (2018). Exploring the complex context of Canadian Indigenous maternal child-health through maternity experiences: The role of social determinants of health. *Social Determinants of Health*, 4(2), 54-67. <https://doi.org/10.22037/sdh.v4i2.19504>
- [15] Harding, L. (2018). *What’s the harm? Examining the stereotyping of Indigenous peoples in health systems* [Unpublished doctoral thesis]. Simon Fraser University.

- [16] Joseph, B. (2018). *21 Things you may not know about the Indian Act: Helping Canadians make reconciliation with Indigenous peoples a reality*. Indigenous Relations Press.
- [17] Hyett, S. L., Gabel, C., Marjerrison, S., & Shwartz, L. (2019). Deficit-Based Indigenous health research and the stereotyping of Indigenous peoples *Canadian Journal of Bioethics*, 2(2), 2561-4665. <https://doi.org/10.7202/1065690ar>
- [18] Public Health Agency of Canada. (2020). *Pregnancy, Childbirth and Caring for Newborns: Advice for Mothers During COVID-19*. Available online at: <https://www.canada.ca/en/public-health/services/diseases/2019-novel-coronavirus-infection/prevention-risks/pregnancy-childbirth-newborn.html#a1>
- [19] Quinn, P., Williamson, B., & Gibbs, L. (2022). Indigenous-informed disaster recovery: Addressing collective trauma using a healing framework. *Progress in Disaster Science*, 16, 100257.
- [20] Smylie, J., O'Brien, K., Beaudoin, E., Daoud, N., Bourgeois, C., Harney George, E., Bebee, K., & Ryan, C. (2021). Long-distance travel for birthing among Indigenous and non-Indigenous pregnant people in Canada. *Canadian Medical Association Journal*, 193, 948-955. <https://doi.org/10.1503/cmaj.201903>
- [21] Leason, J. (2021). Indigenous women's stress and postpartum depression: Discussions from the Canadian maternity experiences survey and Indigenous maternity narratives. *International Journal of Indigenous Health*, 16(2), 225-243. <https://doi.org/10.32799/ijih.v16i2.33180>
- [22] Dayan, J., Creveuil, C., Marks, M. N., Conroy, S., Herlicoviez, M., Dreyfus, M., & Tordjman, S. (2006). Prenatal depression, prenatal anxiety, and spontaneous preterm birth: a prospective cohort study among women with early and regular care. *Psychosomatic Medicine*, 68, 938-946. <https://doi.org/10.1097/01.psy.0000244025.20549.bd>
- [23] Elsenbruch, S., Benson, S., Rucke, M., Rose, M., Dudenhausen, J., Pincus-Knackstedt, M. K., Klapp, B. F., & Arch, P. C. (2007). Social support during pregnancy: Effects on maternal depressive symptoms, smoking and pregnancy outcome. *Human Reproduction*, 22(3), 869-877. <https://doi.org/10.1093/humrep/del432>
- [24] Hessami, K., Romanelli, C., Chiurazzi, M., & Cozzolino, M. (2022). COVID-19 pandemic and maternal mental health: a systematic review and meta-analysis. *The Journal of Maternal-Fetal & Neonatal Medicine*, 35(20), 4014-4021. <https://doi.org/10.1080/14767058.2020.1843155>
- [25] Lebel, C., MacKinnon, A., Bagshawe, M., Tomfohr-Madsen, L., & Giesbrecht, G. (2020). Elevated depression and anxiety symptoms among pregnant individuals during the

- COVID-19 pandemic. *Journal of Affective Disorders*, 277, 5-13.  
<https://doi.org/10.1016/j.jad.2020.07.126>
- [26] Racine, N., Hetherington, E., McArthur, B. A., McDonald, S., Edwards, S., Tough, S., & Madigan, S. (2021). Maternal depressive and anxiety symptoms before and during the COVID-19 pandemic in Canada: a longitudinal analysis. *The Lancet Psychiatry*, 8(5), 405-415. [https://doi.org/10.1016/S2215-0366\(21\)00074-2](https://doi.org/10.1016/S2215-0366(21)00074-2)
- [27] Tomfohr-Madsen, L. M., Racine, N., Giesbrecht, G. F., Lebel, C., & Madigan, S. (2021). Depression and anxiety in pregnancy during COVID-19: A rapid review and meta-analysis. *Psychiatry Research*, 300, 113912.  
<https://doi.org/10.1016/j.psychres.2021.113912>
- [28] Cena, L., Gigantesco, A., Mirabella, F., Palumbo, G., Camoni, L., Trainini, A., & Stefana, A. (2021). Prevalence of comorbid anxiety and depressive symptomatology in the third trimester of pregnancy: Analysing its association with sociodemographic, obstetric, and mental health features. *Journal of Affective Disorders*, 295, 1398–1406.  
<https://doi.org/10.1016/j.jad.2021.09.015>
- [29] Giesbrecht, G.F., van de Wouw, M., Rioux, C., Lai, B.P.Y., King, S., Tomfohr-Madsen, L & Lebel, C. (2022). Cumulative effects of pre-pandemic vulnerabilities and pandemic-related hardship on psychological distress among pregnant individuals. *General Hospital Psychiatry* (e-pub ahead of print). <https://doi.org/10.1016/j.genhosppsych.2023.04.016>.
- [30] Matsumura, K., Hamazaki, K., Tsuchida, A., Kasamatsu, H., Inadera, H., & Japan Environment and Children's Study (JECS) Group. (2019). Education level and risk of postpartum depression: Results from the Japan Environment and Children's Study (JECS). *BMC Psychiatry*, 19(1), 419. <https://doi.org/10.1186/s12888-019-2401-3>
- [31] Bowen, A., Bowen, R., Maslany, G., & Muhajarine, N. (2008). Anxiety in a socially high-risk sample of pregnant women in Canada. *Canadian Journal of Psychiatry*, 53(7), 435-430. <https://doi.org/10.1177/070674370805300708>
- [32] Statistics Canada. (2021). Indigenous population continues to grow and is much younger than the non-Indigenous population, although the pace of growth has slowed. *Statistics Canada*. Retrieved from <https://www150.statcan.gc.ca/n1/daily-quotidien/220921/dq220921a-eng.htm>
- [33] Toombs, E., Lund, J., & Mushquash, C. J. (2022). Adverse childhood experiences (ACEs) are increasing in indigenous populations in Canada: Now what? *Canadian Psychology / Psychologie Canadienne*, 63(4), 576. <https://doi.org/10.1037/cap0000331>
- [34] Bowen, A., Stewart, N., Baetz, M., & Muhajarine, N. (2009). Antenatal depression in socially high-risk women in Canada. *Journal of Epidemiology & Community Health*, 63(5), 414–416. <https://doi.org/10.1136/jech.2008.078832>

- [35] Giesbrecht, G. F., Bagshawe, M., van Sloten, M., MacKinnon, A. L., Dhillon, A., van de Wouw, M., Vaghef-Mehrabany, E., Rojas, L., Cattani, D., Lebel, C., & Tomfohr-Madsen, L. (2021). Protocol for the pregnancy during the COVID-19 pandemic (PdP) study: A longitudinal cohort study of mental health among pregnant Canadians during the COVID-19 pandemic and developmental outcomes in their children. *JMIR Research Protocols*, *10*(4). <https://doi.org/10.2196/25407>
- [36] Khoury, J. E., Atkinson, L., Bennett, T., Jack, S. M., & Gonzalez, A. (2021). COVID-19 and mental health during pregnancy: The importance of cognitive appraisal and social support. *Journal of Affective Disorders*, *282*, 1161-1169. <https://doi.org/10.1016/j.jad.2021.01.027>
- [37] Richardson, L., & Crawford, A. (2020). Covid-19 and the decolonization of Indigenous public health. *Canadian Medical Association Journal*, *193*(38). <https://doi.org/10.1503/cmaj.200852>
- [38] Shah, P. S., Zao, J., Al-Wassia, H., & Shah, V. (2011). Pregnancy and neonatal outcomes of Aboriginal women: A systemic review and meta-analysis. *Women's Health Issues*, *21*(1), 28-30. <https://doi.org/10.1016/j.whi.2010.08.005>
- [39] Wenman, W. M., Joffres, M. R., & Tataryn, I. V. (2004). A prospective cohort study of pregnancy risk factors and birth outcomes in Aboriginal women. *Canadian Medical Association Journal*, *171*(6), 585-589. <https://doi.org/10.1503/cmaj.1031730>
- [40] Cox, R. G., Zhang, L., & Zotti, M. E. (2011). Prenatal care utilization in Mississippi: Racial disparities and implications for unfavorable birth outcomes. *Maternal and Child Health Journal*, *15*, 931-942. <https://doi.org/10.1007/s10995-009-0542-6>
- [41] World Health Organization. (2015). Coronavirus disease (COVID-19) pandemic. *World Health Organization*. Retrieved from [https://www.who.int/emergencies/diseases/novel-coronavirus-2019?adgroupsurvey={adgroupsurvey}&gclid=Cj0KCQjwqoibBhDUARIsAH2OpWg7LF8VOzjaOhcblG19HYFxwtM-waYjs7kg8W3U2z5Im7el1wEQFRsaAm4BEALw\\_wcB](https://www.who.int/emergencies/diseases/novel-coronavirus-2019?adgroupsurvey={adgroupsurvey}&gclid=Cj0KCQjwqoibBhDUARIsAH2OpWg7LF8VOzjaOhcblG19HYFxwtM-waYjs7kg8W3U2z5Im7el1wEQFRsaAm4BEALw_wcB)
- [42] Carlin, E., Seear, K. H., Ferrari, K., Spry, E., Atkinson, D., & Marley, J. V. (2020). Risk and resilience: a mixed methods investigation of Aboriginal Australian women's perinatal mental health screening assessments. *Social Psychiatry and Psychiatric Epidemiology*, *56*, 547-557. <https://doi.org/10.1007/s00127-020-01986-7>
- [43] Ilska, M., & Przybyla-Basista, H. (2019). The role of partner support, ego-resiliency, prenatal attitudes towards maternity and pregnancy in psychological well-being of women in high-risk and low-risk pregnancy. *Psychology, Health & Medicine*, *25*(5), 630-638. <https://doi.org/10.1080/13548506.2020.1737718>

- [44] Firouzbakht, M., Rahmani, N., Sharif Nia, H., & Omidvar, S. (2022). Coping strategies and depression during the COVID-19 pandemic in pregnant women: a cross sectional study. *BMC psychiatry*, 22(1), 1-8. <https://doi.org/10.1186/s12888-022-03792-8>
- [45] Penengo, C., Colli, C., Cesco, M., Croccia, V., Degano, M., Ferreghini, A., ... & Balestrieri, M. (2022). Stress, coping, and psychiatric symptoms in pregnant women in outpatient care during the 2021 second-wave COVID-19 pandemic. *Frontiers in Psychiatry*, 12, 2461. <https://doi.org/10.3389/fpsy.2021.775585>
- [46] Wheeler, Misra, D. P., & Giurgescu, C. (2021). Stress and coping among pregnant black women during the COVID-19 pandemic. *Public Health Nursing (Boston, Mass.)*, 38(4), 596–602. <https://doi.org/10.1111/phn.12909>
- [47] Rieger, K. L., & Heaman, M. I. (2016). Factors associated with high levels of perceived prenatal stress among inner-city women. *Journal of Obstetric, Gynecologic & Neonatal Nursing*, 45(2), 180-195. <https://doi.org/10.1016/j.jogn.2015.12.005>
- [48] Owais, S., Faltyn, M., Johnson, A. V., Gabel, C., Downey, B., Kates, N., & Van Lieshout, R. J. (2020). The perinatal mental health of indigenous women: a systematic review and meta-analysis. *The Canadian Journal of Psychiatry*, 65(3), 149-163. <https://doi.org/10.1177/0706743719877029>
- [49] Niccols, A., Dell, C. A., & Clarke, S. (2010). Treatment issues for Aboriginal mothers with substance use problems and their children. *International journal of mental health and addiction*, 8, 320-335. <https://doi.org/10.1007/s11469-009-9255-8>
- [50] Ritland, L., Jongbloed, K., Mazzuca, A., Thomas, V., Richardson, C. G., Spittal, P. M., & Guhn, M. (2020). Culturally safe, strengths-based parenting programs supporting Indigenous families impacted by substance use—a scoping review. *International Journal of Mental Health and Addiction*, 18, 1586-1610. <https://doi.org/10.1007/s11469-020-00237-9>
- [51] Roy, A. (2019). Intergenerational Trauma and Aboriginal Women: Implications for Mental Health During Pregnancy 1. *First Peoples Child & Family Review*, 14(1), 211-224. <https://doi.org/10.7202/1071297ar>
- [52] Kovach, M. (2010). *Indigenous methodologies: Characteristics, conversations, and contexts*. University of Toronto Press.
- [53] Cox, J. L., Holden, J. M., & Sagovsky, R. (1987). Detection of postnatal depression: Development of the 10-item Edinburgh Postnatal Depression Scale. *British Journal of Psychiatry*, 150(6), 782-786. <https://doi.org/10.1192/bjp.150.6.782>
- [54] Pilkonis, P. A., Choi, S. W., Reise, S. P., Stover, A. M., Riley, W. T., Cella, D., & PROMIS Cooperative Group. (2011). Item banks for measuring emotional distress from the Patient-Reported Outcomes Measurement Information System (PROMIS): Depression,

- 1  
2  
3 anxiety, and anger. *Assessment*, 18(3). 263-83.  
4 <https://doi.org/10.1177/1073191111411667>  
5  
6  
7 [55] Rini C.K., Dunkel Schetter C., Hobel C., Glynn L., Sandman C.A. (2006). Effective social  
8 support: Antecedents and consequences of partner support during pregnancy. *Pers.*  
9 *Relationships*, 13(2), 207–229. <https://doi.org/10.1111/j.1475-6811.2006.00114.x>  
10  
11 [56] Cohen S., Hoberman H. (1983) Positive events and social supports as buffers of life change  
12 stress. *Journal of Applied. Social. Psychology* 13, 99–125. [https://doi.org/10.1111/j.1559-](https://doi.org/10.1111/j.1559-1816.1983.tb02325.x)  
13 [1816.1983.tb02325.x](https://doi.org/10.1111/j.1559-1816.1983.tb02325.x)  
14  
15  
16 [57] Aftyka, A., Rozalska, I., Pawlak, A., Mazur, A., Bednarek, A., & Zarzycka, D. (2019).  
17 Internal consistency and accuracy of Interpersonal Support Evaluation List (ISEL-40) in  
18 mothers of healthy children and those with a medical history. *Annals of Agricultural and*  
19 *Environmental Medicine*, 26(1). <https://doi.org/10.26444/aaem/91783>  
20  
21  
22 [58] Braun, V., & Clarke, V. (2008). Using thematic analysis in psychology. *Qualitative*  
23 *Research in Psychology*, 3(2), 77–101. <https://doi.org/10.1191/1478088706qp063oa>  
24  
25 [59] Delve. (2020). Introduction to qualitative coding with Delve. [PowerPoint Slides].  
26 [https://documentcloud.adobe.com/link/review?uri=urn:aaid:scds:US:660c0e6d-45bf-](https://documentcloud.adobe.com/link/review?uri=urn:aaid:scds:US:660c0e6d-45bf-4c00-8752-3a6139414feb)  
27 [4c00-8752-3a6139414feb](https://documentcloud.adobe.com/link/review?uri=urn:aaid:scds:US:660c0e6d-45bf-4c00-8752-3a6139414feb)  
28  
29  
30 [60] Ali, S. A., Dero, A. A., Ali, S. A., & Ali, G. B. (2018). Factors affecting the utilization of  
31 antenatal care among pregnant women: a literature review. *J Preg Neonatal Med*, 2(2).  
32 <https://doi.org/10.35841/neonatal-medicine.2.2.41-45>  
33  
34 [61] Aranda, Z., Binde, T., Tashman, K., Tadikonda, A., Mawindo, B., Maweu, D., Boley, E. J.,  
35 Mphande, I., Dumbuya, I., Montaña, M., Clisbee, M., Mvula, M. G., Ndayizigiye, M.,  
36 Jean-Baptiste, M. C., Varney, P. F., Anyango, S., Grépin, K. A., Law, M. R., Mugunga, J.  
37 C., ... Fulcher, I. R. (2022). Disruptions in maternal health service use during the COVID-  
38 19 pandemic in 2020: Experiences from 37 health facilities in low-income and middle-  
39 income countries. *BMJ Global Health*, 7(1), e007247. [https://doi.org/10.1136/bmjgh-2021-](https://doi.org/10.1136/bmjgh-2021-007247)  
40 [007247](https://doi.org/10.1136/bmjgh-2021-007247)  
41  
42  
43 [62] Bayrampour, H., Tamana, S. K., & Boutin, A. (2022). Pregnant people's responses to the  
44 COVID-19 pandemic: a mixed-methods, descriptive study. *Canadian Medical Association*  
45 *Open Access Journal*, 10(1), E146-E154. <https://doi.org/10.9778/cmajo.20210136>  
46  
47  
48 [63] Brislane, Á., Larkin, F., Jones, H., & Davenport, M. H. (2021). Access to and quality of  
49 healthcare for pregnant and postpartum women during the COVID-19 pandemic.  
50 *Frontiers in Global Women's Health*, 2, 628625.  
51 <https://doi.org/10.3389/fgwh.2021.628625>  
52  
53  
54  
55  
56  
57  
58  
59

- [64] Kotlar, B., Gerson, E., Petrillo, S., Langer, A., & Tiemeier, H. (2021). The impact of the COVID-19 pandemic on maternal and perinatal health: a scoping review. *Reproductive health, 18*, 1-39. <https://doi.org/10.1186/s12978-021-01070-6>
- [65] Liu, C. H., Koire, A., Erdei, C., & Mittal, L. (2021). Unexpected changes in birth experiences during the COVID-19 pandemic: Implications for maternal mental health. *Archives of gynecology and obstetrics*, 1-11. <https://doi.org/10.1007/s00404-021-06310-5>
- [66] American College of Obstetricians and Gynecologists. (2006). Psychosocial risk factors: perinatal screening and intervention. *Obstetrics and Gynecology, 108*, 469-477. <https://doi.org/10.1097/00006250-200608000-00046>
- [67] Geller, P. A. (2004). Pregnancy as a stressful life event. *CNS spectrums, 9*(3), 188-197. <https://doi.org/10.1017/s1092852900008981>
- [68] Kingston, D., Heaman, M., Fell, D., Dzakpasu, S., & Chalmers, B. (2012). Factors associated with perceived stress and stressful life events in pregnant women: findings from the Canadian Maternity Experiences Survey. *Maternal and child health journal, 16*, 158-168. <https://doi.org/10.1007/s10995-010-0732-2>
- [69] Cameron, E. E., Joyce, K. M., Delaquis, C. P., Reynolds, K., Protudjer, J. L., & Roos, L. E. (2020). Maternal psychological distress & mental health service use during the COVID-19 pandemic. *Journal of affective disorders, 276*, 765-774. <https://doi.org/10.1016/j.jad.2020.07.081>
- [70] Rudrum, S. (2021). Pregnancy during the global COVID-19 pandemic: Canadian experiences of care. *Frontiers in Sociology, 6*, 611324. <https://doi.org/10.3389/fsoc.2021.611324>
- [71] Stirling Cameron, E., Ramos, H., Aston, M., Kuri, M., & Jackson, L. (2021). "COVID affected us all:" the birth and postnatal health experiences of resettled Syrian refugee women during COVID-19 in Canada. *Reproductive health, 18*, 1-11. <https://doi.org/10.1186/s12978-021-01309-2>
- [72] Maslow, A. H. (1943). A theory of human motivation. *Psychological review, 50*(4), 370-396. <https://doi.org/10.1037/h0054346>
- [73] Hajizadeh, M., Hu, M., Bombay, A., & Asada, Y. (2018). Socioeconomic inequalities in health among Indigenous peoples living off-reserve in Canada: Trends and determinants. *Health Policy, 122*, 854-865. <https://doi.org/10.1016/j.healthpol.2018.06.011> 0168-8510
- [74] Truth and Reconciliation Commission of Canada. (2015). Honouring the trust and reconciling for the future: Summary of the final report of the Truth and Reconciliation Commission of Canada. *The Truth and Reconciliation Commission of Canada*. Retrieved from: [https://ehprnh2mwo3.exactdn.com/wp-content/uploads/2021/01/Executive\\_Summary\\_English\\_Web.pdf](https://ehprnh2mwo3.exactdn.com/wp-content/uploads/2021/01/Executive_Summary_English_Web.pdf)

- 1  
2  
3  
4 [75] Bedaso, A., Adams, J., Peng, W., & Sibbritt, D. (2021). The relationship between social  
5 support and mental health problems during pregnancy: A systematic review and meta-  
6 analysis. *Reproductive Health*, 18(1), 162. <https://doi.org/10.1186/s12978-021-01209-5>  
7  
8  
9 [76] Leach, L. S., Poyser, C., & Fairweather-Schmidt, K. (2017). Maternal perinatal anxiety: A  
10 review of prevalence and correlates. *Clinical Psychologist*, 21(1), 4–19.  
11 <https://doi.org/10.1111/cp.12058>  
12  
13 [77] Westdahl, C., Milan, S., Magriples, U., Kershaw, T. S., Rising, S. S., & Ickovics, J. R.  
14 (2007). Social Support and Social Conflict as Predictors of Prenatal Depression.  
15 *Obstetrics and Gynecology*, 110(1), 134–140.  
16 <https://doi.org/10.1097/01.AOG.0000265352.61822.1b>  
17  
18 [78] Prime, H., Wade, M., & Browne, D. T. (2020). Risk and resilience in family well-being  
19 during the COVID-19 pandemic. *American Psychologist*, 75(5), 631–643.  
20 <https://doi.org/10.1037/amp0000660>  
21  
22 [79] Daugherty, J. C., Bueso-Izquierdo, N., Lara-Cinisomo, S., Lozano-Ruiz, A., & Caparros-  
23 Gonzalez, R. A. (2022). Partner relationship quality, social support and maternal stress  
24 during pregnancy and the first COVID-19 lockdown. *Journal of Psychosomatic*  
25 *Obstetrics & Gynecology*, 43(4), 563–573.  
26 <https://doi.org/10.1080/0167482X.2022.2101446>  
27  
28 [80] Farewell, C. V., Thayer, Z., Paulson, J., Nicklas, J., Walker, C., Waldie, K., Morton, S., &  
29 Leiferman, J. A. (2022). Fostering Resilience Among Mothers Early (FRAME): Using  
30 growth mixture modeling to identify resources that mitigate perinatal depression.  
31 *Archives of Women's Mental Health*, 25(2), 451–461. <https://doi.org/10.1007/s00737-022-01211-1>  
32  
33 [81] Kinser, P., Jallo, N., Moyer, S., Weinstock, M., Barrett, D., Mughal, N., ... & Rider, A.  
34 (2022). “It's always hard being a mom, but the pandemic has made everything harder”: A  
35 qualitative exploration of the experiences of perinatal women during the COVID-19  
36 pandemic. *Midwifery*, 109, 103313. <https://doi.org/10.1016/j.midw.2022.103313>  
37  
38 [82] Ahmad, M., & Vismara, L. (2021). The psychological impact of COVID-19 pandemic on  
39 women's mental health during pregnancy: A rapid evidence review. *International*  
40 *Journal of Environmental Research and Public Health*, 18(13), 7112.  
41 <https://doi.org/10.3390/ijerph18137112>  
42  
43 [83] Black, K. A., MacDonald, I., Chambers, T., & Ospina, M. B. (2019). Postpartum mental  
44 health disorders in indigenous women: A systematic review and meta-analysis. *Journal of*  
45 *Obstetrics and Gynaecology Canada*, 41(10), 1470-1478.  
46 <https://doi.org/10.1016/j.jogc.2019.02.009>  
47  
48  
49  
50  
51  
52  
53  
54  
55  
56  
57  
58  
59



- 1  
2  
3 [84] Nerestant, A. (2021, October 5). *If Joyce Echaquan were white, she would still be alive*,  
4 *Quebec Coroner says* | *CBC News*. CBCnews. Retrieved March 27, 2023, from  
5 [https://www.cbc.ca/news/canada/montreal/echaquan-coroner-report-health-care-system-](https://www.cbc.ca/news/canada/montreal/echaquan-coroner-report-health-care-system-racism-1.6199964)  
6 [racism-1.6199964](https://www.cbc.ca/news/canada/montreal/echaquan-coroner-report-health-care-system-racism-1.6199964)  
7  
8  
9 [85] Lazarus, R. S., & Folkman, S. (1984). *Stress, appraisal, and coping*. Springer.  
10  
11 [86] Blackstock, C. (2011). The emergence of the breath of life theory. *Journal of Social Work*  
12 *Values and Ethics*, 8(1), 1-16.  
13  
14 [87] Statistics Canada (2022). Median after-tax income, median market income and median  
15 government transfers for families and unattached individuals. *Statistics Canada*.  
16 Retrieved from [https://www150.statcan.gc.ca/n1/daily-quotidien/220323/cg-a001-](https://www150.statcan.gc.ca/n1/daily-quotidien/220323/cg-a001-eng.htm)  
17 [eng.htm](https://www150.statcan.gc.ca/n1/daily-quotidien/220323/cg-a001-eng.htm)  
18  
19  
20 [88] Statistics Canada. (2019). Results from the 2016 Census: Housing, income and residential  
21 dissimilarity among Indigenous people in Canadian cities. *Statistics Canada*. Retrieved  
22 from <https://www150.statcan.gc.ca/n1/pub/75-006-x/2019001/article/00018-eng.htm>  
23  
24  
25 [89] Lux, M. (1998). Perfect subjects: Race, tuberculosis, and the Qu'Appelle BCG Vaccine  
26 Trial. *Canadian Bulletin of Medical History*, 15(2), 277-295.  
27 <https://doi.org/10.3138/cbmh.15.2.277>  
28  
29  
30 [90] Mosby, I. (2013). Administering colonial science: Nutrition research and human biomedical  
31 experimentation in Aboriginal communities and residential schools, 1942–1952. *Histoire*  
32 *sociale/Social history*, 46(1), 145-172. <https://doi.org/10.1353/his.2013.0015>  
33  
34  
35  
36  
37  
38  
39  
40  
41  
42  
43  
44  
45  
46  
47  
48  
49  
50  
51  
52  
53  
54  
55  
56  
57  
58  
59  
60

**Figure Legend:**

Figure 1 - Flow chart.

**Figure 1**  
*Coping Strategies Themes and subthemes*

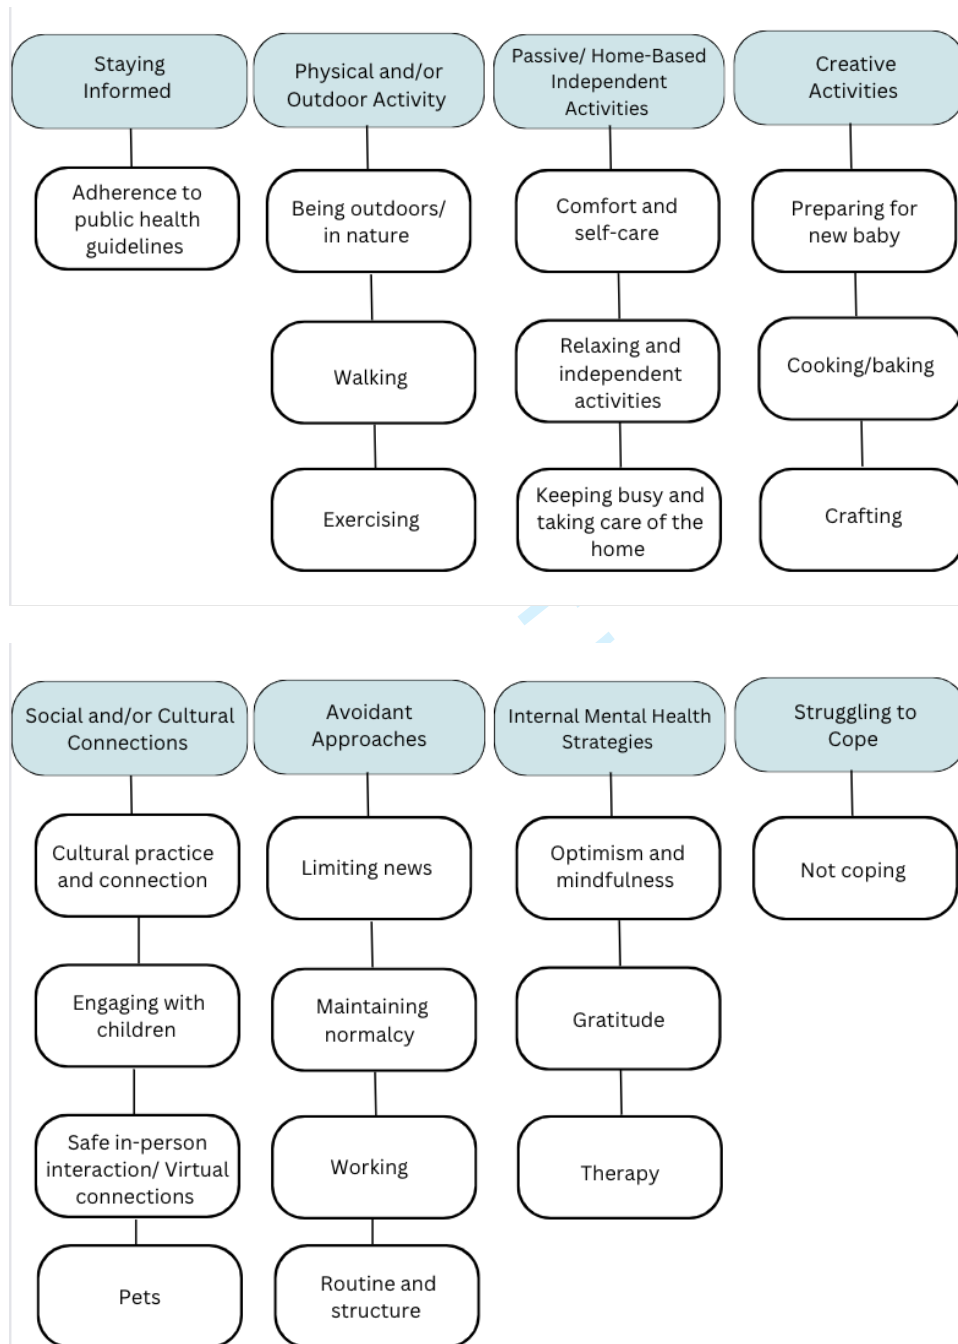

STROBE Statement—Checklist of items that should be included in reports of *cross-sectional studies*

|                           | Item No | Recommendation                                                                                                                                                                       | Manuscript Location                       |
|---------------------------|---------|--------------------------------------------------------------------------------------------------------------------------------------------------------------------------------------|-------------------------------------------|
| <b>Title and abstract</b> | 1       | (a) Indicate the study's design with a commonly used term in the title or the abstract                                                                                               | Page 1 (title page)                       |
|                           |         | (b) Provide in the abstract an informative and balanced summary of what was done and what was found                                                                                  | Page 2                                    |
| <b>Introduction</b>       |         |                                                                                                                                                                                      |                                           |
| Background/rationale      | 2       | Explain the scientific background and rationale for the investigation being reported                                                                                                 | Page 3-4                                  |
| Objectives                | 3       | State specific objectives, including any prespecified hypotheses                                                                                                                     | Page 4, paragraph 4                       |
| <b>Methods</b>            |         |                                                                                                                                                                                      |                                           |
| Study design              | 4       | Present key elements of study design early in the paper                                                                                                                              | Page 4, paragraph 4                       |
| Setting                   | 5       | Describe the setting, locations, and relevant dates, including periods of recruitment, exposure, follow-up, and data collection                                                      | Page 5, paragraph 1                       |
| Participants              | 6       | (a) Give the eligibility criteria, and the sources and methods of selection of participants                                                                                          | Page 5, paragraphs 1 and 2                |
| Variables                 | 7       | Clearly define all outcomes, exposures, predictors, potential confounders, and effect modifiers. Give diagnostic criteria, if applicable                                             | Page 5, paragraph 3 - page 6, paragraph 5 |
| Data sources/measurement  | 8*      | For each variable of interest, give sources of data and details of methods of assessment (measurement). Describe comparability of assessment methods if there is more than one group | Page 5, paragraph 3 – page 6, paragraph 5 |
| Bias                      | 9       | Describe any efforts to address potential sources of bias                                                                                                                            |                                           |
| Study size                | 10      | Explain how the study size was arrived at                                                                                                                                            | Page 5, paragraph 2                       |
| Quantitative variables    | 11      | Explain how quantitative variables were handled in the analyses. If applicable, describe which groupings were chosen and why                                                         | Page 6, paragraph 6                       |
| Statistical methods       | 12      | (a) Describe all statistical methods, including those used to control for confounding                                                                                                | Page 6-7                                  |
|                           |         | (b) Describe any methods used to examine subgroups and interactions                                                                                                                  | N/A                                       |
|                           |         | (c) Explain how missing data were addressed                                                                                                                                          | Page 6, paragraph 4                       |
|                           |         | (d) If applicable, describe analytical methods taking account of sampling strategy                                                                                                   | N/A                                       |
|                           |         | (e) Describe any sensitivity analyses                                                                                                                                                | N/A                                       |
| <b>Results</b>            |         |                                                                                                                                                                                      |                                           |
| Participants              | 13*     | (a) Report numbers of individuals at each stage of study—eg numbers potentially eligible, examined for eligibility, confirmed eligible, included in the study,                       | N/A                                       |

|                          |     |                                                                                                                                                                                                              |                                     |
|--------------------------|-----|--------------------------------------------------------------------------------------------------------------------------------------------------------------------------------------------------------------|-------------------------------------|
|                          |     | completing follow-up, and analysed                                                                                                                                                                           |                                     |
|                          |     | (b) Give reasons for non-participation at each stage                                                                                                                                                         | N/A                                 |
|                          |     | (c) Consider use of a flow diagram                                                                                                                                                                           | N/A                                 |
| Descriptive data         | 14* | (a) Give characteristics of study participants (eg demographic, clinical, social) and information on exposures and potential confounders                                                                     | Page 5, paragraph 2                 |
|                          |     | (b) Indicate number of participants with missing data for each variable of interest                                                                                                                          | Page 6, paragraph 6                 |
| Outcome data             | 15* | Report numbers of outcome events or summary measures                                                                                                                                                         | N/A                                 |
| Main results             | 16  | (a) Give unadjusted estimates and, if applicable, confounder-adjusted estimates and their precision (eg, 95% confidence interval). Make clear which confounders were adjusted for and why they were included | Page 6, paragraph 7                 |
|                          |     | (b) Report category boundaries when continuous variables were categorized                                                                                                                                    | Page 8; 10-11                       |
|                          |     | (c) If relevant, consider translating estimates of relative risk into absolute risk for a meaningful time period                                                                                             | N/A                                 |
| Other analyses           | 17  | Report other analyses done—eg analyses of subgroups and interactions, and sensitivity analyses                                                                                                               | Page 13 – 17 (qualitative analysis) |
| <b>Discussion</b>        |     |                                                                                                                                                                                                              |                                     |
| Key results              | 18  | Summarise key results with reference to study objectives                                                                                                                                                     | Page 17-18                          |
| Limitations              | 19  | Discuss limitations of the study, taking into account sources of potential bias or imprecision. Discuss both direction and magnitude of any potential bias                                                   | Page 20, paragraph 3                |
| Interpretation           | 20  | Give a cautious overall interpretation of results considering objectives, limitations, multiplicity of analyses, results from similar studies, and other relevant evidence                                   | Page 17-21                          |
| Generalisability         | 21  | Discuss the generalisability (external validity) of the study results                                                                                                                                        | Page 21, paragraph 1                |
| <b>Other information</b> |     |                                                                                                                                                                                                              |                                     |
| Funding                  | 22  | Give the source of funding and the role of the funders for the present study and, if applicable, for the original study on which the present article is based                                                | Page 21                             |

\*Give information separately for exposed and unexposed groups.

**Note:** An Explanation and Elaboration article discusses each checklist item and gives methodological background and published examples of transparent reporting. The STROBE checklist is best used in conjunction with this article (freely available on the Web sites of PLoS Medicine at <http://www.plosmedicine.org/>, Annals of Internal Medicine at <http://www.annals.org/>, and Epidemiology at <http://www.epidem.com/>). Information on the STROBE Initiative is available at [www.strobe-statement.org](http://www.strobe-statement.org).
